# Supplementary material for: Bipolar luminescent materials containing pyrimidine terminals: synthesis, photophysical properties and a theoretical study
Source: Royal Society of Chemistry journal article supplement (doi:10.1039/c3ra43631d), 2013-01-01
Supplement: c3ra43631d.pdf [file c3ra43631d.pdf]

# Bipolar luminescent materials containing pyrimidine terminals: synthesis, photophysical and theoretical study

Jiena Weng,<sup>a</sup> Qunbo Mei,<sup>\*a</sup> Quli Fan,<sup>a</sup> Qidan Ling,<sup>a</sup> Bihai Tong<sup>c</sup> and Wei Huang<sup>\*a,b</sup>

<sup>a</sup> Key Laboratory for Organic Electronics & Information Displays and Institute of Advanced Materials, Nanjing University of Posts & Telecommunications, Nanjing 210046, China. Fax: +86 25 8586 6533; Tel: +86 25 8586 6396  
E-mail: [iamqbmei@njupt.edu.cn](mailto:iamqbmei@njupt.edu.cn) (Q. Mei), [iamwhuang@njupt.edu.cn](mailto:iamwhuang@njupt.edu.cn) (W. Huang)

<sup>b</sup> Jiangsu-Singapore Joint Research Center for Organic/Bio- Electronics & Information Displays and Institute of Advanced Materials, Nanjing University of Technology, Nanjing 211816, China. Fax: +86 25 5813 9988; Tel: +86 25 5813 9001.

<sup>c</sup> Institute of Molecular Engineering and Applied Chemistry, College of Metallurgy and Resources, Anhui University of Technology, Ma'anshan, Anhui 243002, P. R. China.

## Contents:

1. Supplementary UV – vis and PL spectra data -----(S1 – S2)
2. Cyclic voltammogram of PM1 – PM5 in DCM solution -----(S3)
3. The optimized ground-state geometries of PM compounds by DFT/B3LYP/6-31G(d) –  
----- (S3 – S9)
4. The simulated absorption spectra and detailed data by DFT//B3LYP/6-31G(d) – – – –  
----- (S10)
5. Characterization: NMR and MS spectra – – – – – (S11 – S26)

## 1. Supplementary UV – vis and PL spectra data

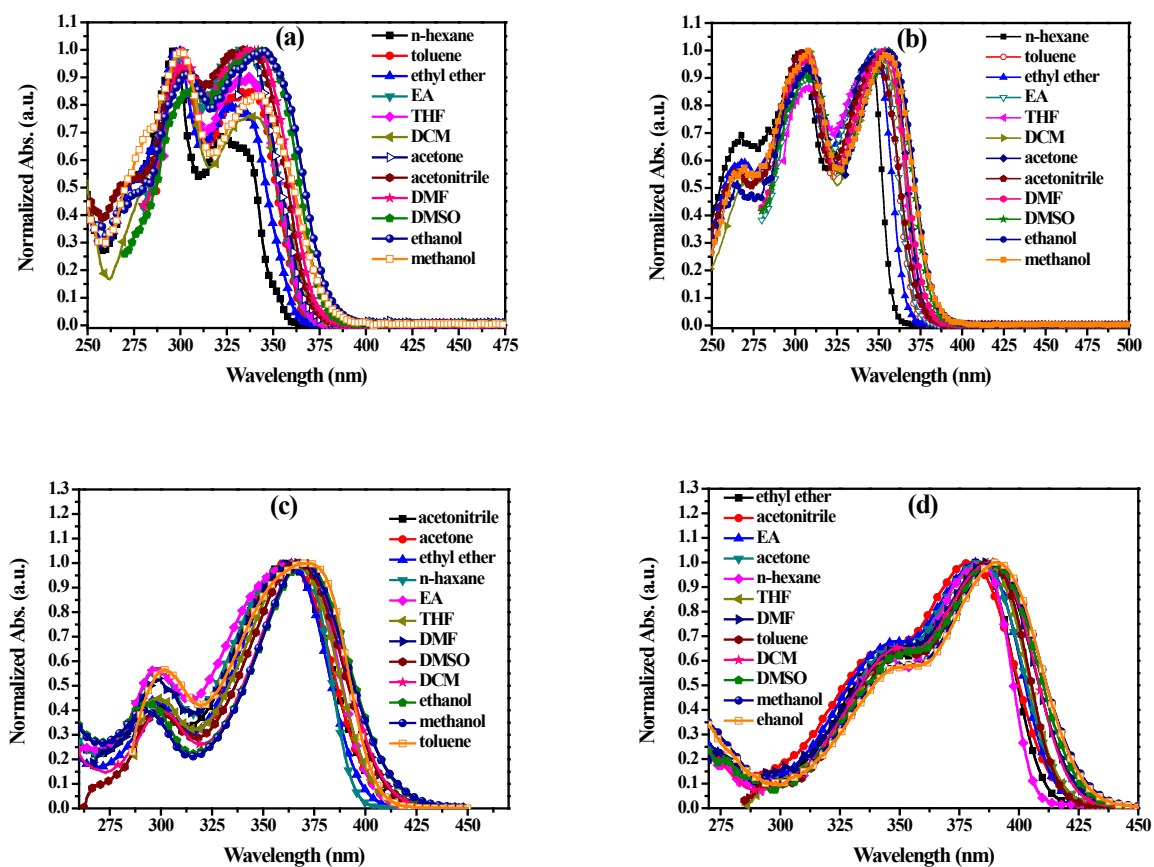

**Figure S1** Normalized absorption spectra of PM1 (a), PM2 (b), PM3 (c) and PM4 (d) recorded in different solvents.

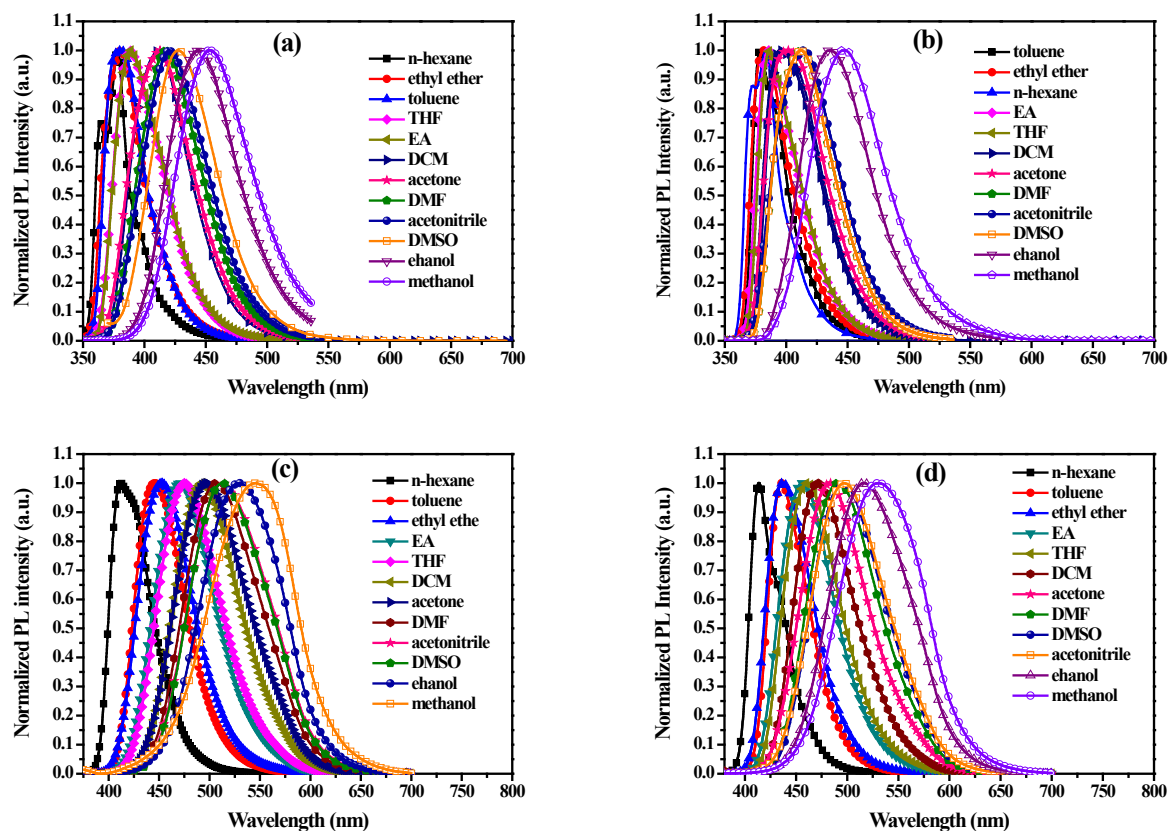

**Figure S2** Normalized photoluminescence spectra ( $\lambda_{\text{ex}} = 360\text{nm}$ ) of **PM1** (a), **PM2** (b), **PM3** (c) and **PM4** (d) recorded in different solvents.

**Table S1** Optical properties of **PM1 – PM5** in solvents of varying polarity

| solvent          | $\Delta f^a$ | $\lambda_{\text{abs, max}}$ (nm) |     |     |     |     | $\lambda_{\text{em, max}}$ (nm) |     |     |       |     |
|------------------|--------------|----------------------------------|-----|-----|-----|-----|---------------------------------|-----|-----|-------|-----|
|                  |              | PM1                              | PM2 | PM3 | PM4 | PM5 | PM1                             | PM2 | PM3 | PM4   | PM5 |
| <i>n</i> -hexane | -0.0014      | 322                              | 345 | 366 | 385 | 381 | 378                             | 383 | 412 | 414   | 416 |
| toluene          | 0.0132       | 332                              | 351 | 372 | 388 | 385 | 381                             | 379 | 446 | 436   | 433 |
| ethyl ether      | 0.1625       | 328                              | 347 | 363 | 382 | 378 | 381                             | 382 | 453 | 437   | 435 |
| EA               | 0.1996       | 332                              | 349 | 366 | 383 | 379 | 389                             | 386 | 470 | 456.6 | 454 |
| THF              | 0.2096       | 337                              | 353 | 366 | 386 | 383 | 388                             | 387 | 475 | 461   | 458 |
| DCM              | 0.2171       | 337                              | 353 | 370 | 389 | 384 | 412                             | 397 | 487 | 472   | 464 |
| acetone          | 0.2841       | 338                              | 356 | 361 | 383 | 378 | 412                             | 402 | 498 | 482   | 475 |
| acetonitrile     | 0.3046       | 334                              | 348 | 360 | 382 | 377 | 420                             | 415 | 513 | 497   | 490 |
| DMF              | 0.2744       | 336                              | 355 | 366 | 387 | 384 | 417                             | 412 | 507 | 492   | 486 |
| DMSO             | 0.2630       | 344                              | 355 | 367 | 389 | 387 | 432                             | 424 | 513 | 496   | 489 |
| ethanol          | 0.2887       | 345                              | 356 | 370 | 390 | 384 | 444                             | 436 | 529 | 517   | 510 |
| methanol         | 0.3086       | 343                              | 355 | 370 | 391 | 384 | 453                             | 448 | 546 | 530   | 522 |

<sup>a</sup> the orientation polarizability  $\Delta f$  derived from Eq.1.

$$\Delta f = \frac{(\epsilon - 1)}{(2\epsilon + 1)} - \frac{(n^2 - 1)}{(2n^2 + 1)} \quad (\text{Eq. 1})$$

## 2. Cyclic voltammogram of PM1 – PM5 in DCM solution

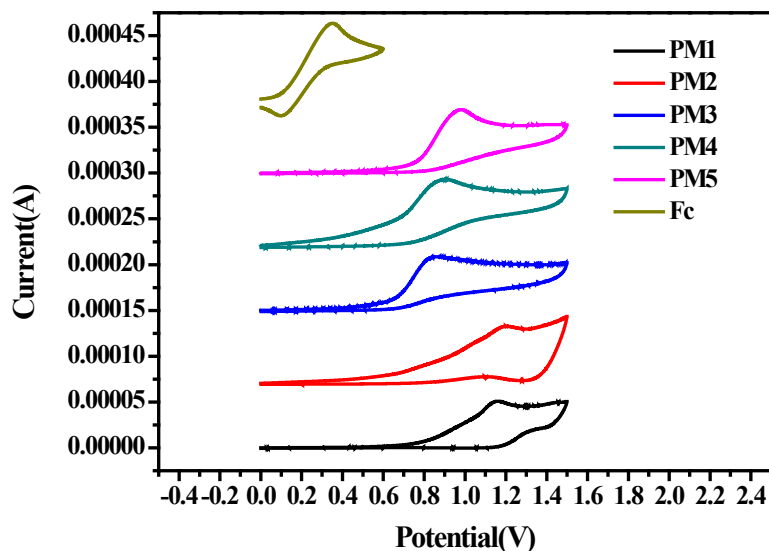

**Figure S3** Cyclic voltammogram of **PM1 – PM5** in DCM solution

## 3. The optimized ground-state geometries of PM compounds by DFT/B3LYP/6-31G(d)

**Table S2** The optimized geometry of **PM1** in ground state at B3LYP/6-31G(d) level

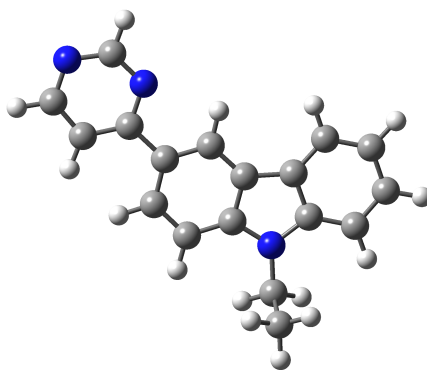

|   | x           | y           | z           |
|---|-------------|-------------|-------------|
| C | 3.32737300  | 2.99499500  | 0.09358500  |
| C | 4.40256200  | 2.09756900  | -0.02057600 |
| C | 4.19335100  | 0.72505800  | -0.14525100 |
| C | 2.87281400  | 0.26748500  | -0.15656300 |
| C | 1.77595700  | 1.16040700  | -0.03822000 |
| C | 2.01360700  | 2.53329000  | 0.08533400  |
| H | 5.42023400  | 2.47833300  | -0.00917300 |
| H | 5.03432400  | 0.04284500  | -0.22666900 |
| H | 1.18325300  | 3.22858800  | 0.17520800  |
| C | 1.00644200  | -1.00031400 | -0.22099500 |
| C | 0.08047300  | -2.04775900 | -0.28407900 |
| C | -1.27020100 | -1.73097200 | -0.21408200 |
| C | -1.72663800 | -0.39835100 | -0.07970000 |
| C | -0.78329800 | 0.63870400  | -0.01326800 |

|   |             |             |             |
|---|-------------|-------------|-------------|
| C | 0.57647200  | 0.34787800  | -0.07995000 |
| H | 0.39490300  | -3.08240100 | -0.38102700 |
| H | -1.98409800 | -2.54640000 | -0.26316800 |
| H | -1.13880800 | 1.65766700  | 0.09135400  |
| N | 2.38949500  | -1.03541600 | -0.28110800 |
| C | 3.20777100  | -2.23571300 | -0.36558600 |
| C | 3.58508100  | -2.81433800 | 1.00248000  |
| H | 4.10684400  | -1.98728200 | -0.93952700 |
| H | 2.65716200  | -2.97442800 | -0.95735100 |
| H | 4.20046500  | -3.71256100 | 0.87809900  |
| H | 4.15325000  | -2.08670400 | 1.59083300  |
| H | 2.69005400  | -3.08599600 | 1.57144200  |
| H | 3.52512000  | 4.05858000  | 0.19061700  |
| C | -3.16835100 | -0.06934700 | -0.00529600 |
| N | -3.49423600 | 1.23613400  | 0.11800000  |
| C | -4.19269500 | -1.03125800 | -0.05608100 |
| C | -4.78687700 | 1.54590600  | 0.18566600  |
| C | -5.50469100 | -0.58291200 | 0.02464800  |
| H | -3.98910900 | -2.09102500 | -0.15427000 |
| N | -5.83161900 | 0.71116700  | 0.14690100  |
| H | -5.02093000 | 2.60498500  | 0.28464000  |
| H | -6.33305500 | -1.28937400 | -0.00994700 |

**Table S3** The optimized geometry of **PM2** in ground state at B3LYP/6-31G(d) level

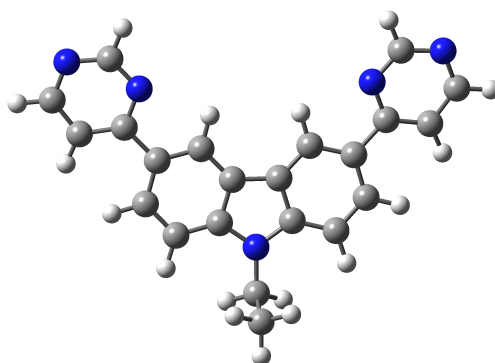

|   | x           | y           | z           |
|---|-------------|-------------|-------------|
| C | -3.04866000 | -0.02137900 | -0.07370800 |
| C | -3.42053400 | 1.34149800  | -0.13856200 |
| C | -2.48062400 | 2.36390200  | -0.18941000 |
| C | -1.12753700 | 2.01103700  | -0.18066500 |
| C | -0.72537900 | 0.65057400  | -0.10687700 |
| C | -1.68605300 | -0.35555700 | -0.05217200 |
| H | -4.47016400 | 1.61622900  | -0.12851100 |
| H | -2.80126100 | 3.40047200  | -0.22551400 |
| H | -1.40602000 | -1.40130300 | 0.00897100  |
| C | 1.12753700  | 2.01103700  | -0.18066500 |
| C | 2.48062400  | 2.36390200  | -0.18941000 |
| C | 3.42053400  | 1.34149700  | -0.13856200 |
| C | 3.04866000  | -0.02137900 | -0.07370800 |
| C | 1.68605300  | -0.35555700 | -0.05217200 |
| C | 0.72537900  | 0.65057400  | -0.10687700 |

|   |             |             |             |
|---|-------------|-------------|-------------|
| H | 2.80126100  | 3.40047200  | -0.22551300 |
| H | 4.47016400  | 1.61622900  | -0.12851100 |
| H | 1.40602000  | -1.40130300 | 0.00897100  |
| N | 0.00000000  | 2.81997700  | -0.23807800 |
| C | 0.00000000  | 4.27612000  | -0.25648100 |
| C | 0.00000000  | 4.90168900  | 1.14228800  |
| H | -0.87700900 | 4.60229400  | -0.82522200 |
| H | 0.87700900  | 4.60229400  | -0.82522200 |
| H | 0.00000000  | 5.99495100  | 1.06822100  |
| H | -0.88591400 | 4.59497600  | 1.70766600  |
| H | 0.88591300  | 4.59497600  | 1.70766700  |
| C | -4.05960700 | -1.10282300 | -0.02110000 |
| N | -3.61142800 | -2.34754300 | 0.24895200  |
| C | -5.43149200 | -0.89585400 | -0.24500900 |
| C | -4.51097100 | -3.32770400 | 0.30095300  |
| C | -6.27211300 | -1.99845200 | -0.15727700 |
| H | -5.83752600 | 0.07812200  | -0.49225900 |
| N | -5.83320300 | -3.23386800 | 0.11960700  |
| H | -4.12414200 | -4.32199500 | 0.51909100  |
| H | -7.34382700 | -1.89119300 | -0.31943500 |
| C | 4.05960700  | -1.10282300 | -0.02110000 |
| N | 3.61142800  | -2.34754300 | 0.24895400  |
| C | 5.43149100  | -0.89585400 | -0.24501100 |
| C | 4.51097100  | -3.32770300 | 0.30095400  |
| C | 6.27211300  | -1.99845200 | -0.15727800 |
| H | 5.83752600  | 0.07812200  | -0.49226200 |
| N | 5.83320300  | -3.23386800 | 0.11960700  |
| H | 4.12414200  | -4.32199400 | 0.51909400  |
| H | 7.34382700  | -1.89119300 | -0.31943700 |

**Table S4** The optimized geometry of **PM3** in ground state at B3LYP/6-31G(d) level

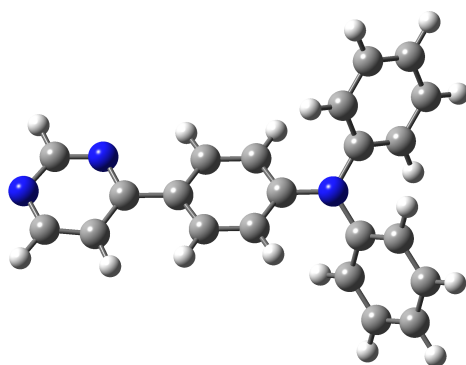

|   | x          | y          | z           |
|---|------------|------------|-------------|
| C | 2.71255300 | 3.46168300 | 0.93070900  |
| C | 2.01435300 | 2.25551800 | 0.91390700  |
| C | 2.38799600 | 1.23609700 | 0.02482100  |
| C | 3.47820100 | 1.44234500 | -0.83390700 |
| C | 4.18173400 | 2.64501600 | -0.79758500 |
| C | 3.80139100 | 3.66276200 | 0.07964200  |
| H | 2.41066300 | 4.24218400 | 1.62407000  |
| H | 1.17695300 | 2.09686500 | 1.58605300  |
| H | 3.76804400 | 0.65736000 | -1.52532100 |
| H | 5.02375800 | 2.79025200 | -1.46916300 |

|   |             |             |             |
|---|-------------|-------------|-------------|
| H | 4.34756000  | 4.60147800  | 0.10046600  |
| N | 1.67833200  | -0.00051500 | 0.00023700  |
| C | 0.26768800  | -0.01671800 | 0.01039500  |
| C | -0.43770300 | -1.04507500 | 0.66332700  |
| C | -0.47320100 | 0.99663600  | -0.62774600 |
| C | -1.82584600 | -1.06106700 | 0.66364300  |
| H | 0.11024600  | -1.82572000 | 1.17974500  |
| C | -1.85983900 | 0.97890400  | -0.60849200 |
| H | 0.04823100  | 1.79514300  | -1.14460500 |
| C | -2.57199800 | -0.05292500 | 0.02899300  |
| H | -2.32739800 | -1.86179800 | 1.19862300  |
| H | -2.42122700 | 1.76234100  | -1.10505400 |
| C | 2.41678700  | -1.21934300 | -0.02952500 |
| C | 2.05389000  | -2.25238100 | -0.90762500 |
| C | 3.52560800  | -1.39530500 | 0.81217900  |
| C | 2.78052300  | -3.44152600 | -0.92991100 |
| H | 1.20344900  | -2.11644600 | -1.56830100 |
| C | 4.25695200  | -2.58108600 | 0.77042900  |
| H | 3.80836700  | -0.59975700 | 1.49433600  |
| C | 3.88723300  | -3.61242600 | -0.09537200 |
| H | 2.48720800  | -4.23209700 | -1.61558400 |
| H | 5.11312100  | -2.70231600 | 1.42878000  |
| H | 4.45566200  | -4.53772100 | -0.12085200 |
| C | -4.04965300 | -0.04589400 | 0.01623000  |
| N | -4.65563700 | 1.07149300  | -0.44108500 |
| C | -4.83255800 | -1.13314900 | 0.44219800  |
| C | -5.98703900 | 1.08586200  | -0.45377500 |
| C | -6.21318700 | -0.99330300 | 0.38712900  |
| H | -4.39205400 | -2.05996400 | 0.79122200  |
| N | -6.81957500 | 0.11624600  | -0.05807500 |
| H | -6.45258300 | 1.99635200  | -0.82842200 |
| H | -6.86516000 | -1.80447600 | 0.70848000  |

**Table S5** The optimized geometry of **PM4** in ground state at B3LYP/6-31G(d) level

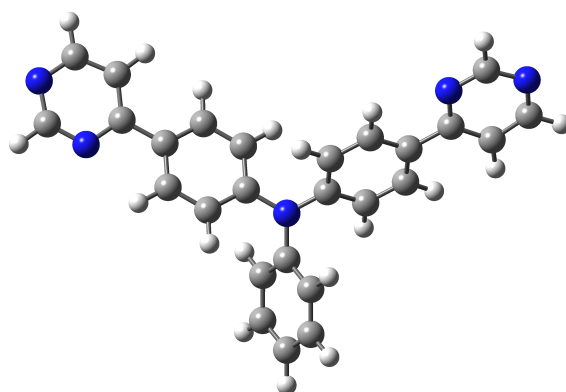

|   | x           | y           | z           |
|---|-------------|-------------|-------------|
| C | -2.57478200 | -1.25253900 | 0.78024900  |
| C | -1.36967300 | -0.56234900 | 0.77513800  |
| C | -1.22400500 | 0.61449500  | 0.01972400  |
| C | -2.32932900 | 1.08060800  | -0.71415300 |
| C | -3.53373000 | 0.39194700  | -0.69077000 |
| C | -3.68397200 | -0.79462200 | 0.04851100  |

|   |             |             |             |
|---|-------------|-------------|-------------|
| H | -2.65066300 | -2.14506400 | 1.39355200  |
| H | -0.53633300 | -0.92657400 | 1.36656400  |
| H | -2.23453800 | 1.98456500  | -1.30668700 |
| H | -4.38118500 | 0.75548700  | -1.26079300 |
| N | 0.00031100  | 1.32542000  | 0.01097200  |
| C | 1.23944000  | 0.64181500  | 0.01791500  |
| C | 2.33099900  | 1.14861000  | 0.74469500  |
| C | 1.41357100  | -0.55114500 | -0.70697100 |
| C | 3.55222100  | 0.48730800  | 0.73677100  |
| H | 2.21262500  | 2.05909900  | 1.32248600  |
| C | 2.63341100  | -1.21210900 | -0.69688000 |
| H | 0.58728200  | -0.95103700 | -1.28539100 |
| C | 3.73400600  | -0.70653800 | 0.01795300  |
| H | 4.36247200  | 0.90179900  | 1.32857700  |
| H | 2.76141100  | -2.12941400 | -1.26038000 |
| C | -0.01564300 | 2.75372700  | -0.00279600 |
| C | 0.78771700  | 3.46166900  | -0.90844300 |
| C | -0.83483100 | 3.46125800  | 0.88878800  |
| C | 0.77568300  | 4.85552200  | -0.91276500 |
| H | 1.41600400  | 2.91494500  | -1.60472000 |
| C | -0.85400300 | 4.85486400  | 0.86556400  |
| H | -1.45295800 | 2.91460000  | 1.59410400  |
| C | -0.04694800 | 5.55922500  | -0.03045000 |
| H | 1.40229300  | 5.39213100  | -1.62008200 |
| H | -1.49409600 | 5.39104900  | 1.56097700  |
| H | -0.05963500 | 6.64529200  | -0.04165500 |
| C | 5.02315200  | -1.43185500 | -0.00605700 |
| N | 5.02447900  | -2.66062000 | -0.56588700 |
| C | 6.21863400  | -0.90310400 | 0.50952000  |
| C | 6.18024100  | -3.32168500 | -0.59147200 |
| C | 7.35840200  | -1.69343600 | 0.43034900  |
| H | 6.27222300  | 0.08799800  | 0.94504800  |
| N | 7.36393000  | -2.91631400 | -0.11796200 |
| H | 6.15761200  | -4.30924800 | -1.04973200 |
| H | 8.31030100  | -1.33301800 | 0.81779500  |
| C | -4.97941300 | -1.50922000 | 0.03841900  |
| N | -6.02542400 | -0.87355400 | -0.53173000 |
| C | -5.15841800 | -2.79452200 | 0.57735600  |
| C | -7.19606700 | -1.50813800 | -0.54375500 |
| C | -6.43072500 | -3.34850500 | 0.51011600  |
| H | -4.34327500 | -3.35428800 | 1.02123900  |
| N | -7.47412900 | -2.71896900 | -0.04755800 |
| H | -8.02434400 | -0.97728100 | -1.01061600 |
| H | -6.62498400 | -4.34047700 | 0.91553400  |

**Table S6** The optimized geometry of **PM5** in ground state at B3LYP/6-31G(d) level



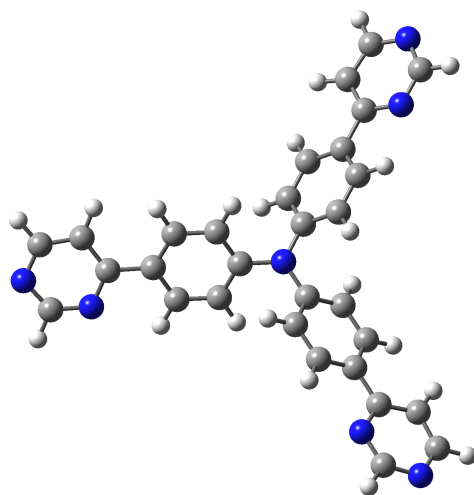

|   | x           | y           | z           |
|---|-------------|-------------|-------------|
| C | 0.29948400  | 3.60716600  | 0.81211500  |
| C | 0.53903000  | 2.23885000  | 0.81168600  |
| C | -0.24010200 | 1.37987800  | 0.01898300  |
| C | -1.27186900 | 1.93224300  | -0.75891700 |
| C | -1.51428100 | 3.29876100  | -0.73963500 |
| C | -0.72996000 | 4.16883400  | 0.03793300  |
| H | 0.91134800  | 4.23414900  | 1.45298100  |
| H | 1.32724700  | 1.82720200  | 1.43322900  |
| H | -1.87849300 | 1.28377800  | -1.38255600 |
| H | -2.31010100 | 3.72090200  | -1.34262700 |
| N | 0.00979400  | -0.01731500 | 0.00818900  |
| C | 1.34463700  | -0.49855500 | 0.01577900  |
| C | 1.70140400  | -1.60605300 | 0.80318100  |
| C | 2.33782500  | 0.12449200  | -0.75922100 |
| C | 3.00758900  | -2.07908100 | 0.80248900  |
| H | 0.95135400  | -2.08633600 | 1.42286600  |
| C | 3.64364500  | -0.34551500 | -0.74172800 |
| H | 2.07663800  | 0.97579600  | -1.37939100 |
| C | 4.00758300  | -1.46183300 | 0.03181700  |
| H | 3.24789700  | -2.92298200 | 1.44176300  |
| H | 4.40623500  | 0.13725300  | -1.34227700 |
| C | -1.07329600 | -0.93393800 | -0.00632000 |
| C | -1.01745400 | -2.09285400 | -0.79855500 |
| C | -2.22416900 | -0.70116300 | 0.76594000  |
| C | -2.07477500 | -2.99371900 | -0.80422300 |
| H | -0.14552200 | -2.27714400 | -1.41737300 |
| C | -3.28231900 | -1.59906400 | 0.74175400  |
| H | -2.28135300 | 0.18592800  | 1.38821700  |
| C | -3.22967700 | -2.76945400 | -0.03566400 |
| H | -2.00165900 | -3.86564500 | -1.44666200 |
| H | -4.16775200 | -1.41595800 | 1.33981000  |
| C | -4.37231100 | -3.71099300 | -0.02622000 |
| N | -5.50251100 | -3.29523100 | 0.58333400  |
| C | -4.32473200 | -4.99018800 | -0.60462600 |
| C | -6.53706000 | -4.13389400 | 0.59438900  |
| C | -5.47239700 | -5.77052800 | -0.53382600 |
| H | -3.43168600 | -5.37690500 | -1.08177300 |
| N | -6.59964200 | -5.35987600 | 0.06262600  |

|   |             |             |             |
|---|-------------|-------------|-------------|
| H | -7.43745100 | -3.77824700 | 1.09272900  |
| H | -5.49131600 | -6.76866200 | -0.96901700 |
| C | 5.40771500  | -1.94270000 | 0.01622700  |
| N | 6.32108500  | -1.14783500 | -0.58017400 |
| C | 5.81034800  | -3.16647400 | 0.57600500  |
| C | 7.58388000  | -1.57099200 | -0.59625800 |
| C | 7.15887300  | -3.49390700 | 0.50254700  |
| H | 5.10768200  | -3.84903300 | 1.03984800  |
| N | 8.07143500  | -2.70496000 | -0.08060700 |
| H | 8.30322400  | -0.91524200 | -1.08422000 |
| H | 7.52591500  | -4.42869700 | 0.92380000  |
| C | -1.00741500 | 5.62323800  | 0.02035900  |
| N | -2.13451200 | 6.02329000  | -0.60514400 |
| C | -0.16057100 | 6.57886300  | 0.60584700  |
| C | -2.39328700 | 7.32956800  | -0.62578800 |
| C | -0.54278800 | 7.91235600  | 0.52362600  |
| H | 0.76688300  | 6.30730200  | 1.09652600  |
| N | -1.66410700 | 8.31464100  | -0.08962700 |
| H | -3.30649500 | 7.62957200  | -1.13726800 |
| H | 0.07531200  | 8.69391400  | 0.96306300  |

#### 4. The simulated absorption spectra and detailed data by DFT//B3LYP/6-31G(d)

**Table S7** The absorption spectra calculated by DFT at B3LYP/6-31G(d) in vacuum and solvent (DCM) of **PM1 – PM5**

| Molecule      | States        | Electron transition | Calculated wavelength (nm) | Excitation energy                                              | Main transition configuration                                  | Oscillator strength $f$ | Dipole moment (Debye) |
|---------------|---------------|---------------------|----------------------------|----------------------------------------------------------------|----------------------------------------------------------------|-------------------------|-----------------------|
| <b>PM1</b>    | Gas-phase     | $S_0$ - $S_1$       | 330.2                      | 3.76                                                           | HOMO→LUMO (0.92)                                               | 0.2954                  | 5.1315                |
|               |               | $S_0$ - $S_2$       | 322.1                      | 3.85                                                           | HOMO→LUMO+1 (0.57)<br>HOMO-1→LUMO (0.39)                       | 0.0031                  |                       |
|               | DCM           | $S_0$ - $S_1$       | 344.5                      | 3.60                                                           | HOMO→LUMO (0.96)                                               | 0.4228                  |                       |
|               |               | $S_0$ - $S_2$       | 325.9                      | 3.80                                                           | HOMO→LUMO+1 (0.51)<br>HOMO-1→LUMO (0.45)                       | 0.0033                  |                       |
| <b>PM2</b>    | Gas-phase     | $S_0$ - $S_1$       | 342.5                      | 3.62                                                           | HOMO→LUMO (0.96)                                               | 0.4677                  | 7.7232                |
|               |               | $S_0$ - $S_2$       | 327.5                      | 3.79                                                           | HOMO→LUMO+2 (0.52)<br>HOMO-1→LUMO (0.31)<br>HOMO→LUMO+1 (0.12) | 0.0011                  |                       |
|               |               |                     | DCM                        | $S_0$ - $S_1$                                                  | 357.3                                                          | 3.47                    |                       |
|               | $S_0$ - $S_2$ | 331.6               | 3.74                       | HOMO→LUMO+2 (0.42)<br>HOMO→LUMO+1 (0.27)<br>HOMO-1→LUMO (0.27) | 0.0194                                                         |                         |                       |
|               |               | DCM                 | $S_0$ - $S_1$              | 393.7                                                          | 3.15                                                           | HOMO→LUMO (0.99)        | 0.7083                |
|               | $S_0$ - $S_2$ |                     | 324.4                      | 3.82                                                           | HOMO→LUMO+1 (0.85)<br>HOMO→LUMO+2 (0.10)                       | 0.0109                  |                       |
| DCM           |               |                     | $S_0$ - $S_1$              | 397.2                                                          | 3.12                                                           | HOMO→LUMO (0.99)        | 0.7848                |
|               | $S_0$ - $S_2$ | 356.3               | 3.48                       | HOMO→LUMO+1 (0.97)                                             | 0.2555                                                         |                         |                       |
|               |               | DCM                 | $S_0$ - $S_1$              | 415.2                                                          | 2.99                                                           | HOMO→LUMO (0.99)        | 0.9041                |
| $S_0$ - $S_2$ | 367.0         |                     | 3.38                       | HOMO→LUMO+1 (0.98)                                             | 0.3145                                                         |                         |                       |
|               | <b>PM3</b>    | Gas-phase           | $S_0$ - $S_1$              | 375.3                                                          | 3.30                                                           | HOMO→LUMO (0.99)        | 0.6056                |
| $S_0$ - $S_2$ |               |                     | 320.6                      | 3.87                                                           | HOMO→LUMO+1 (0.79)<br>HOMO→LUMO+2 (0.09)<br>HOMO→LUMO+3 (0.08) | 0.0114                  |                       |
| DCM           |               | $S_0$ - $S_1$       | 393.7                      | 3.15                                                           | HOMO→LUMO (0.99)                                               | 0.7083                  |                       |
|               |               | $S_0$ - $S_2$       | 324.4                      | 3.82                                                           | HOMO→LUMO+1 (0.85)<br>HOMO→LUMO+2 (0.10)                       | 0.0109                  |                       |
| <b>PM4</b>    | Gas-phase     | $S_0$ - $S_1$       | 397.2                      | 3.12                                                           | HOMO→LUMO (0.99)                                               | 0.7848                  | 3.7588                |
|               |               | $S_0$ - $S_2$       | 356.3                      | 3.48                                                           | HOMO→LUMO+1 (0.97)                                             | 0.2555                  |                       |
|               | DCM           | $S_0$ - $S_1$       | 415.2                      | 2.99                                                           | HOMO→LUMO (0.99)                                               | 0.9041                  |                       |
|               |               | $S_0$ - $S_2$       | 367.0                      | 3.38                                                           | HOMO→LUMO+1 (0.98)                                             | 0.3145                  |                       |
| <b>PM5</b>    | Gas-phase     | $S_0$ - $S_1$       | 399.1                      | 3.11                                                           | HOMO→LUMO (0.99)                                               | 0.6520                  | 3.0592                |
|               |               | $S_0$ - $S_2$       | 395.4                      | 3.14                                                           | HOMO→LUMO+1 (0.99)                                             | 0.6765                  |                       |
|               | DCM           | $S_0$ - $S_1$       | 411.8                      | 3.01                                                           | HOMO→LUMO (0.99)                                               | 0.7685                  |                       |
|               |               | $S_0$ - $S_2$       | 410.6                      | 3.02                                                           | HOMO→LUMO+1 (0.99)                                             | 0.7942                  |                       |

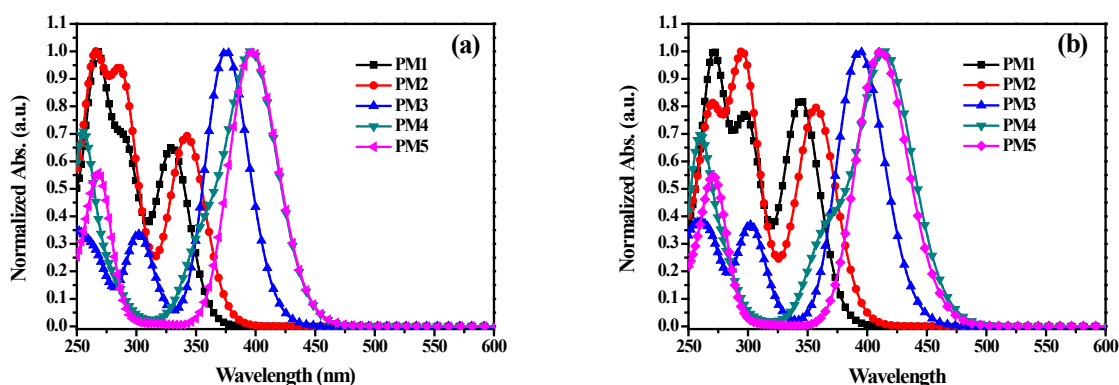

**Figure S4** The simulated absorption spectra of **PM** compounds in vacuum (a) and DCM (b).

## 5. Characterization: NMR and MS spectra

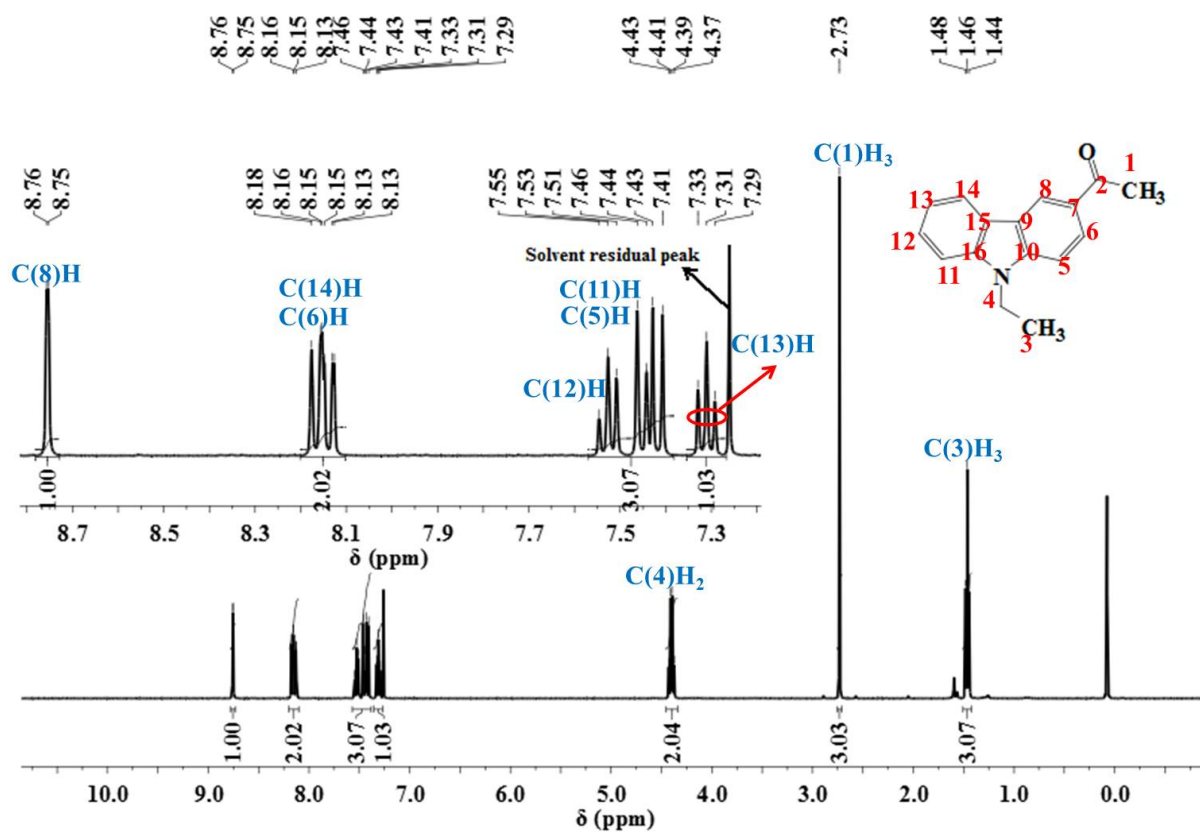

Figure S5  $^1\text{H}$  NMR of A1 in  $\text{CDCl}_3$

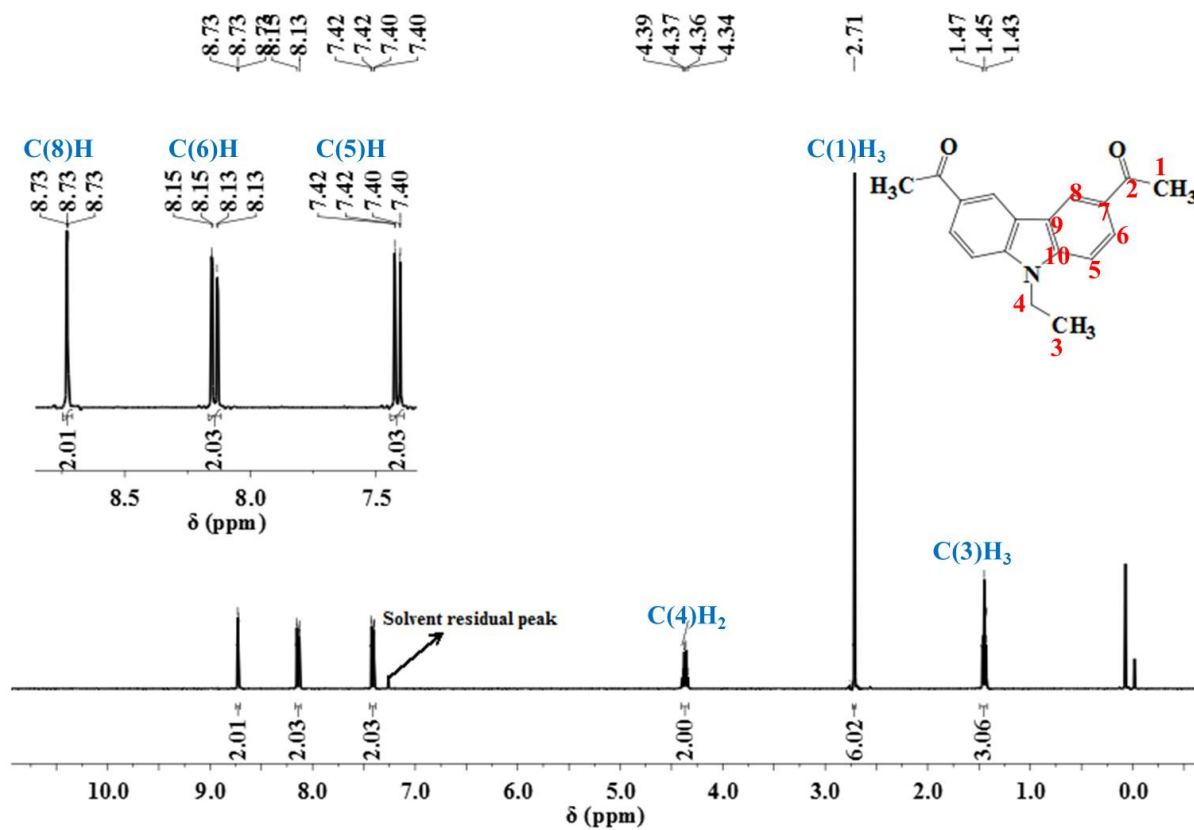

Figure S6  $^{13}\text{C}$  NMR of A1 in  $\text{CDCl}_3$

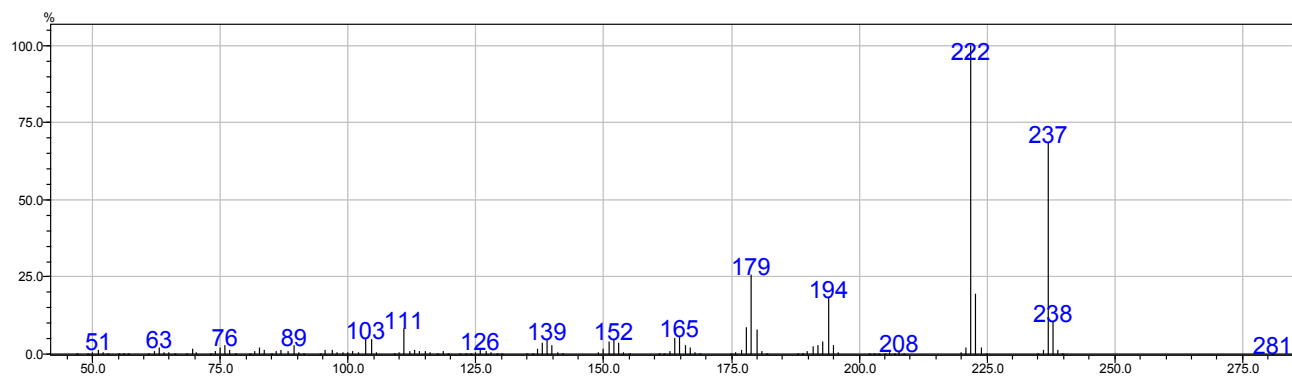

Figure S7 GC-MS spectrum of A1

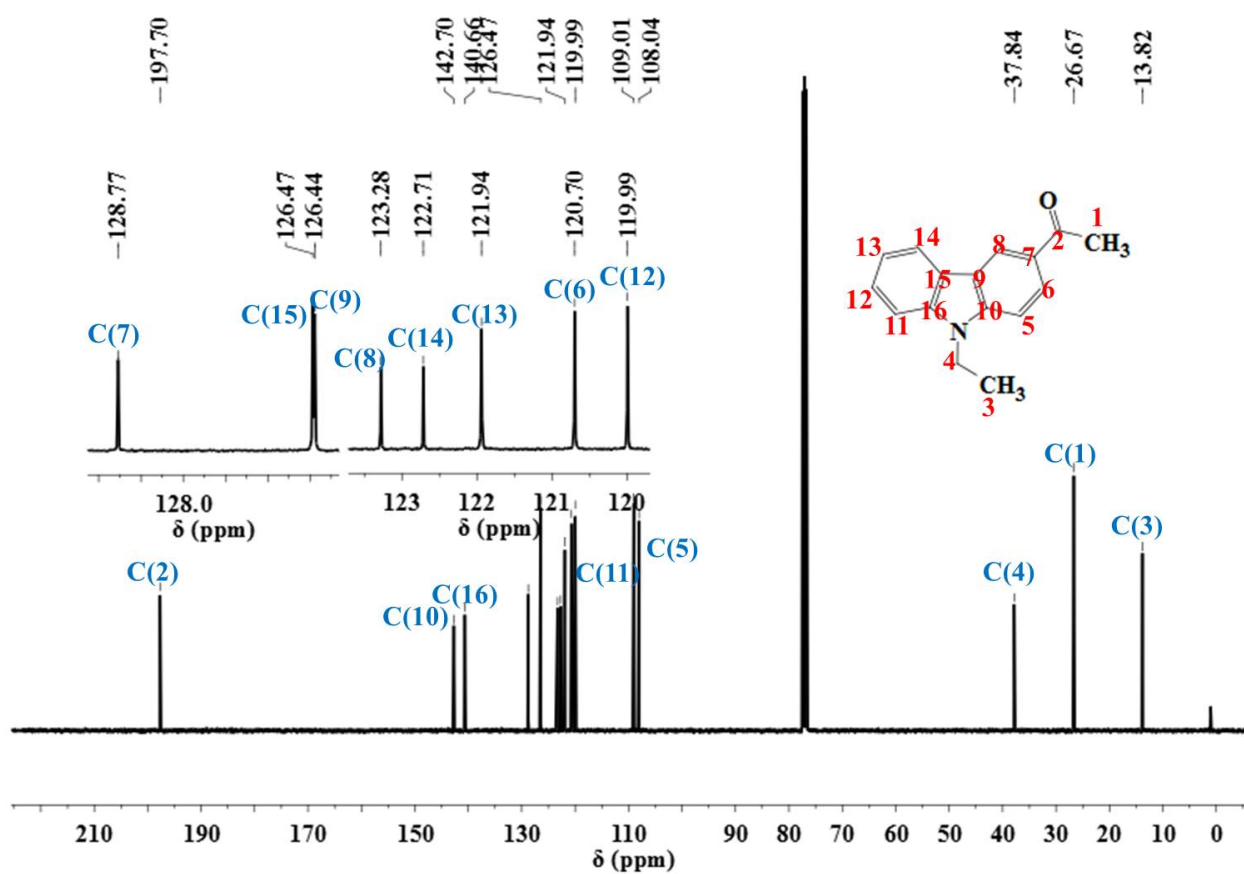

Figure S8  $^{13}\text{C}$  NMR of A2 in  $\text{CDCl}_3$

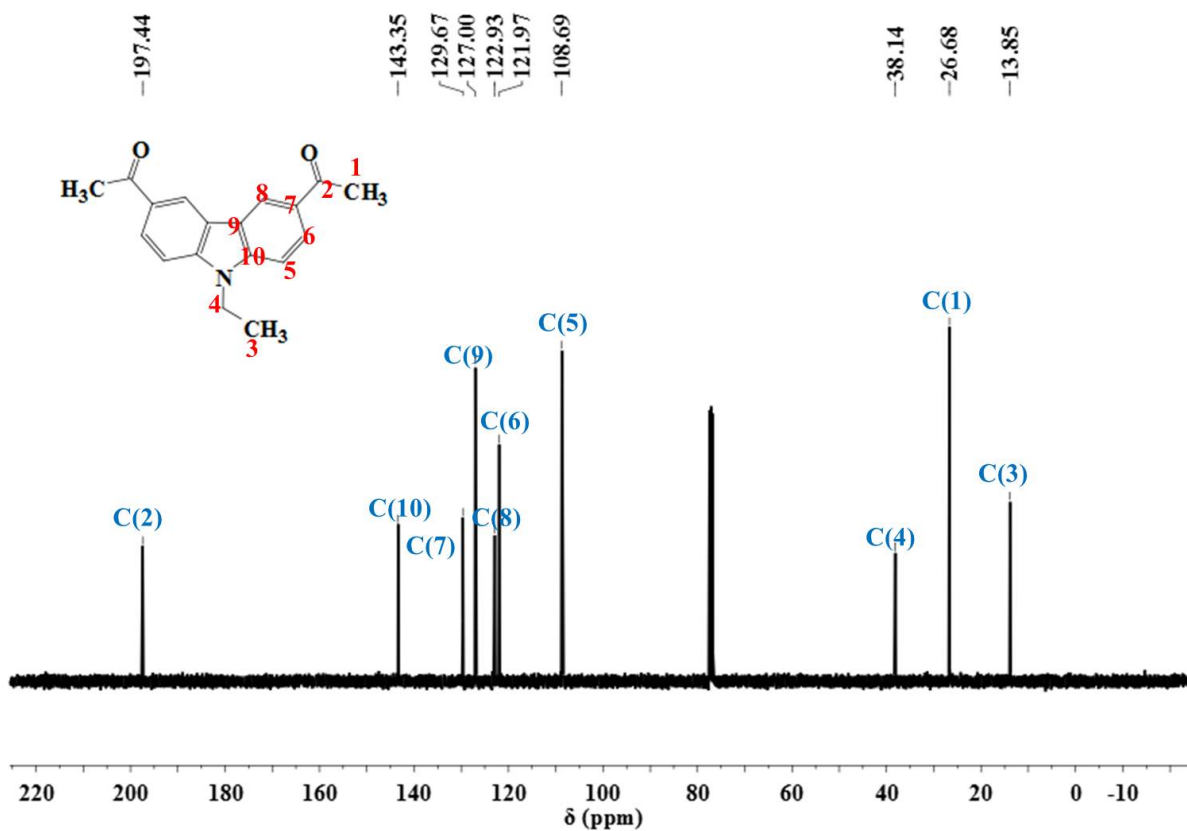

Figure S9 <sup>13</sup>C NMR of A2 in CDCl<sub>3</sub>

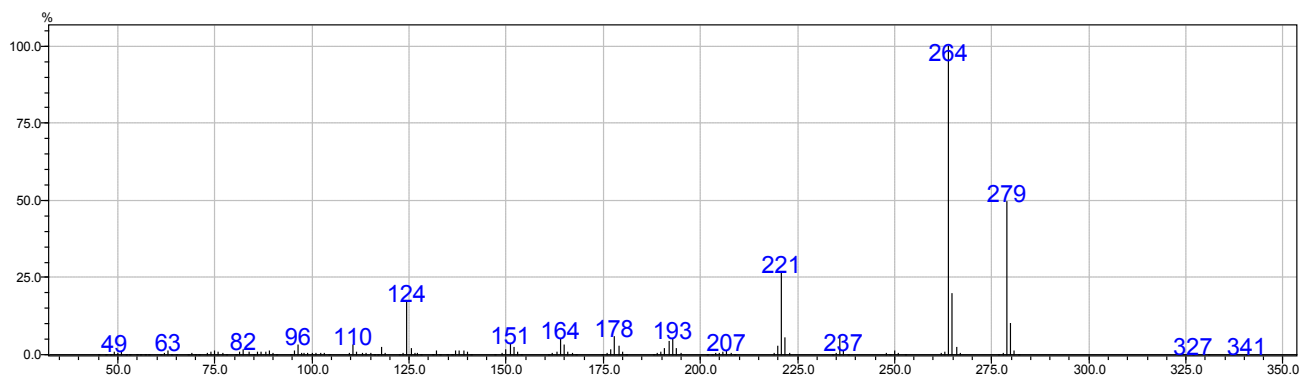

Figure S10 GC-MS spectrum of A2

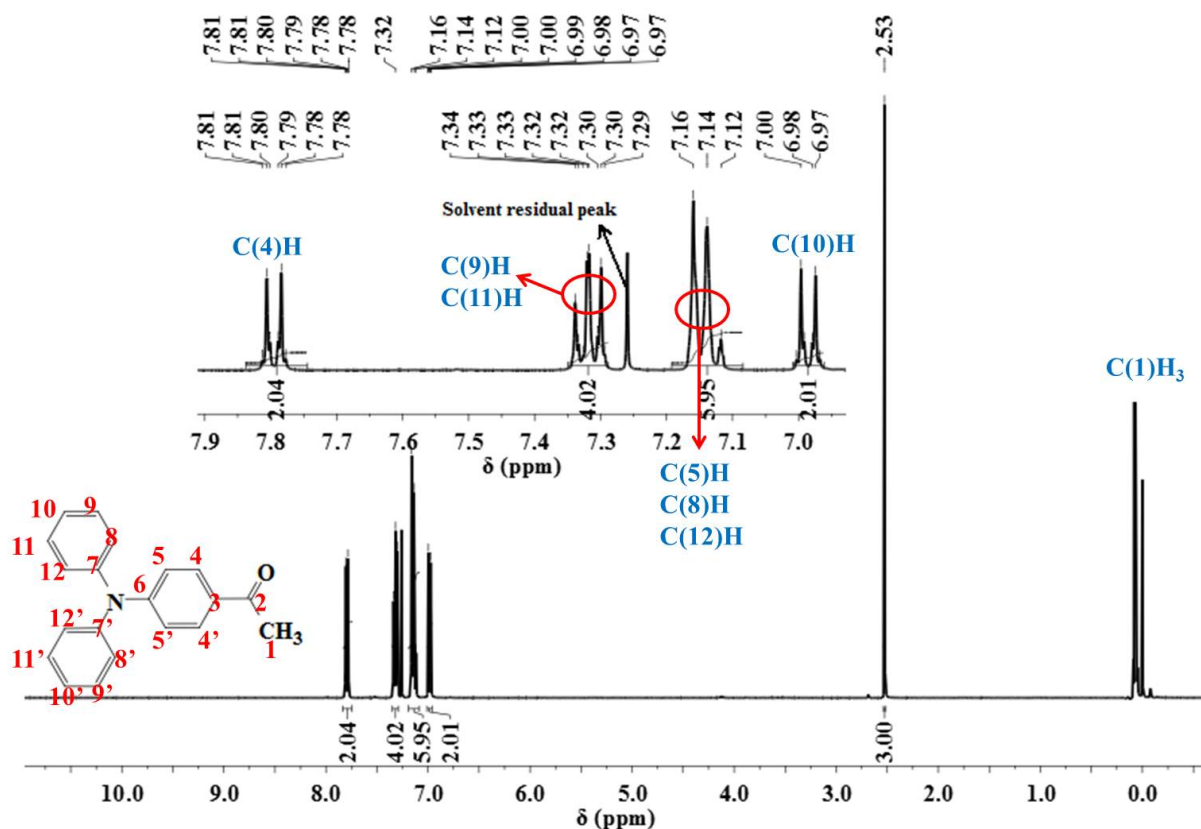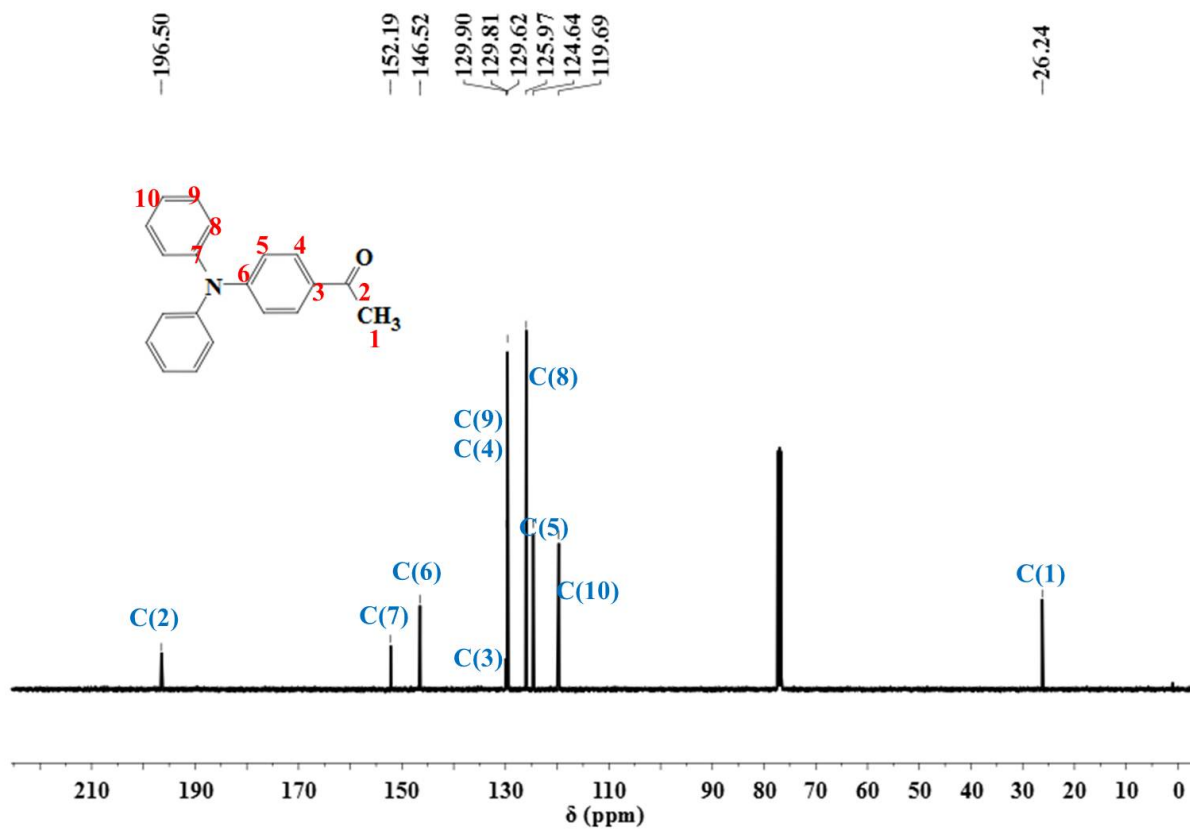

**Figure S12**  $^{13}\text{C}$  NMR of A3 in  $\text{CDCl}_3$

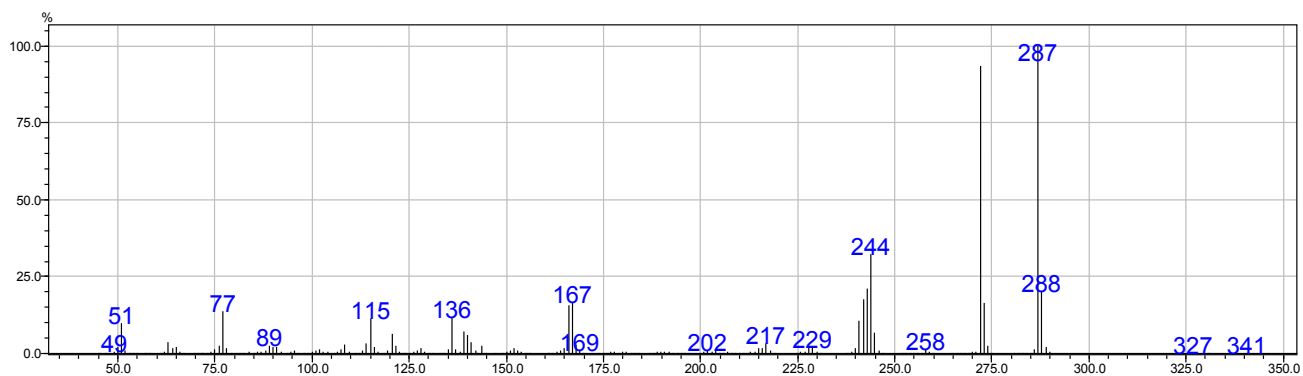

Figure S13 GC-MS spectrum of A3

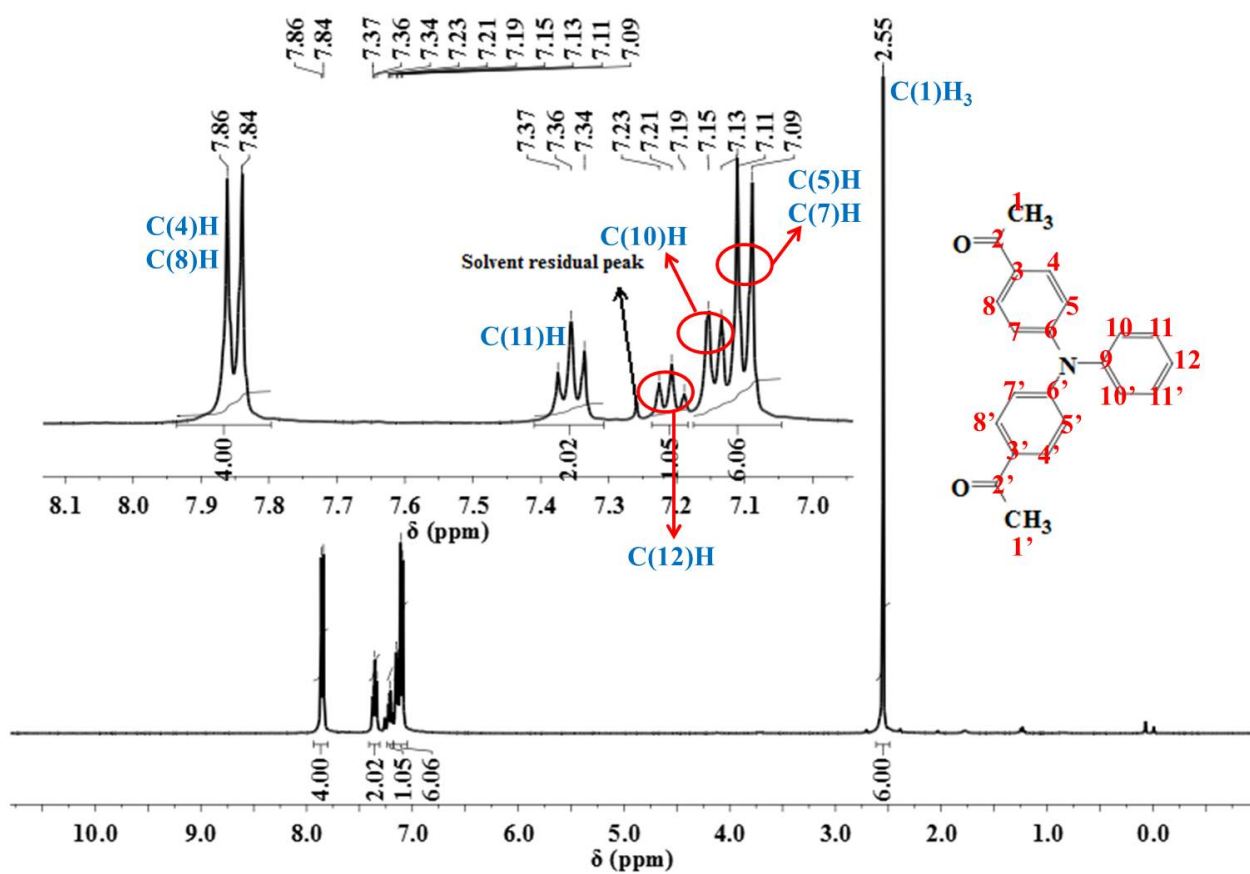

Figure S14 <sup>1</sup>H NMR of A4 in CDCl<sub>3</sub>



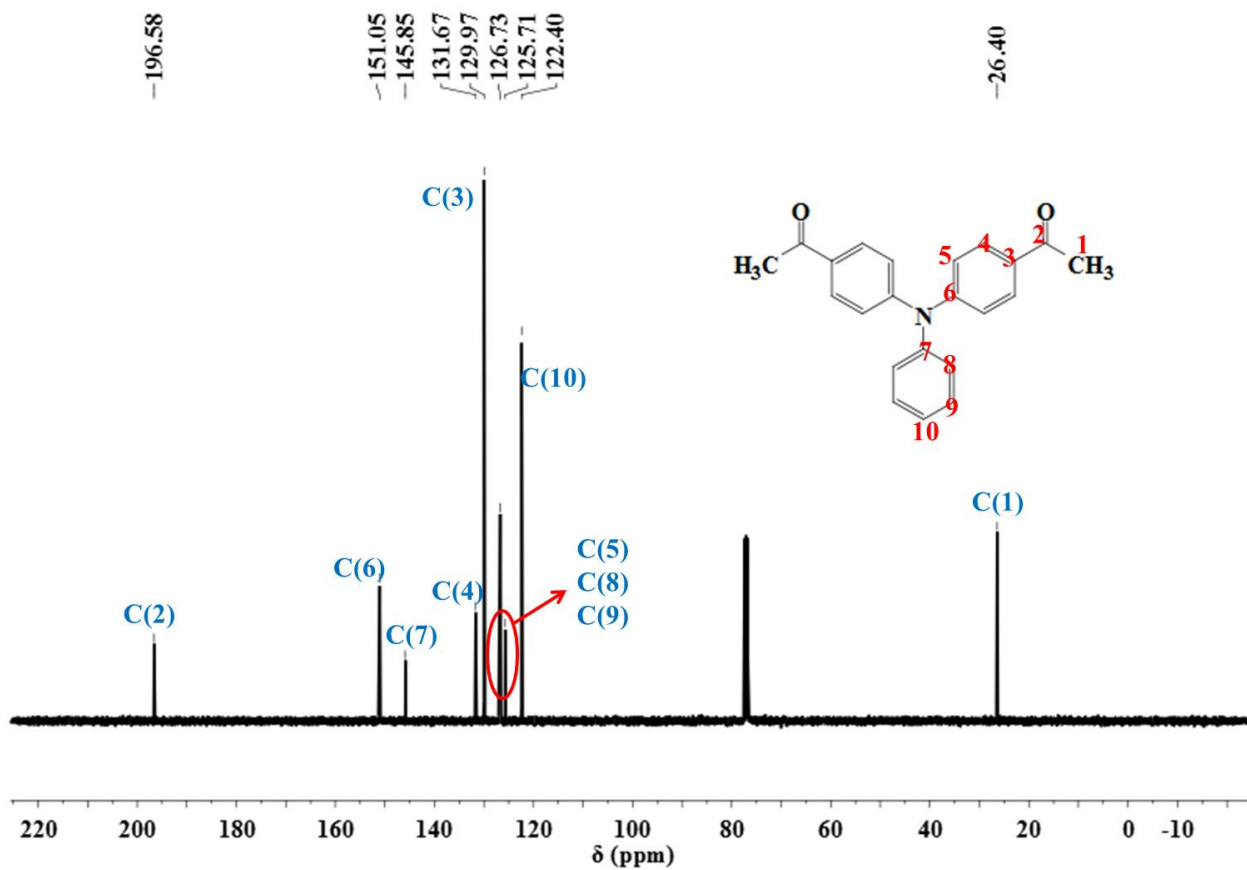

Figure S15  $^{13}\text{C}$  NMR of A4 in  $\text{CDCl}_3$

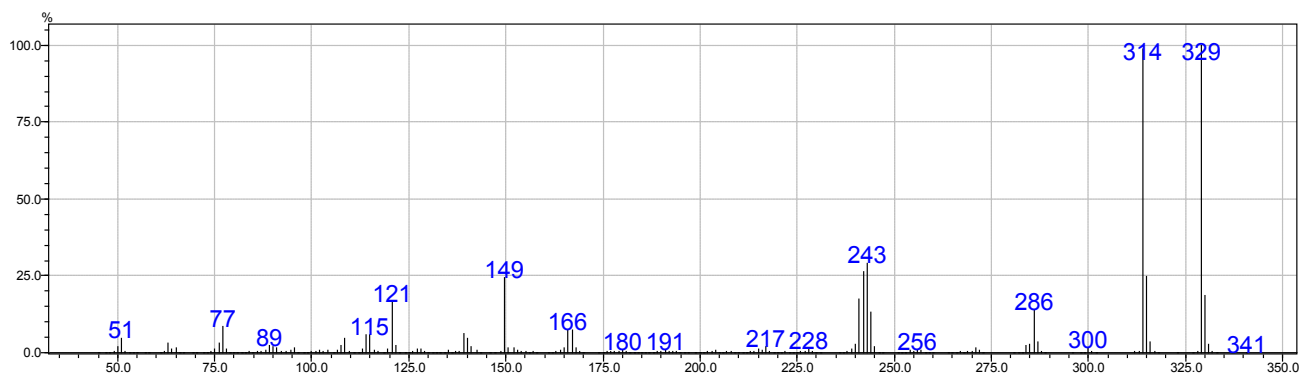

Figure S16 GC-MS spectrum of A4

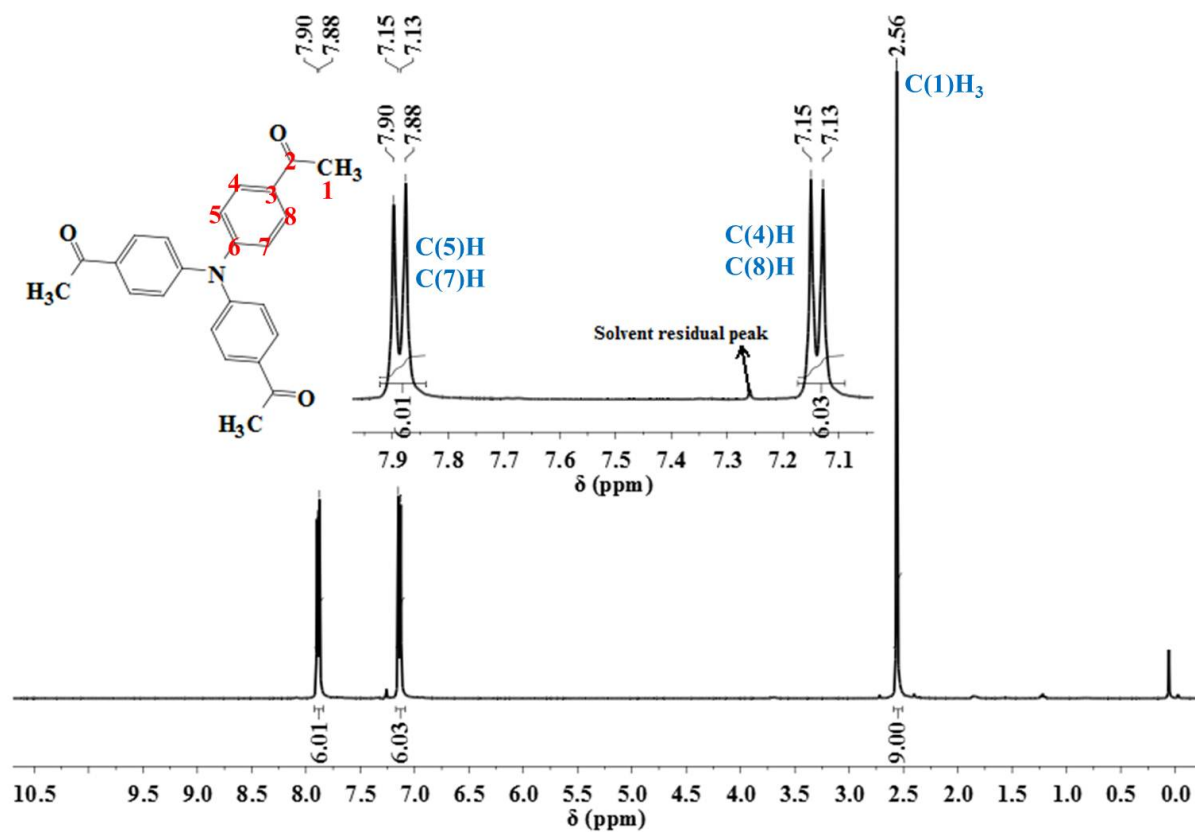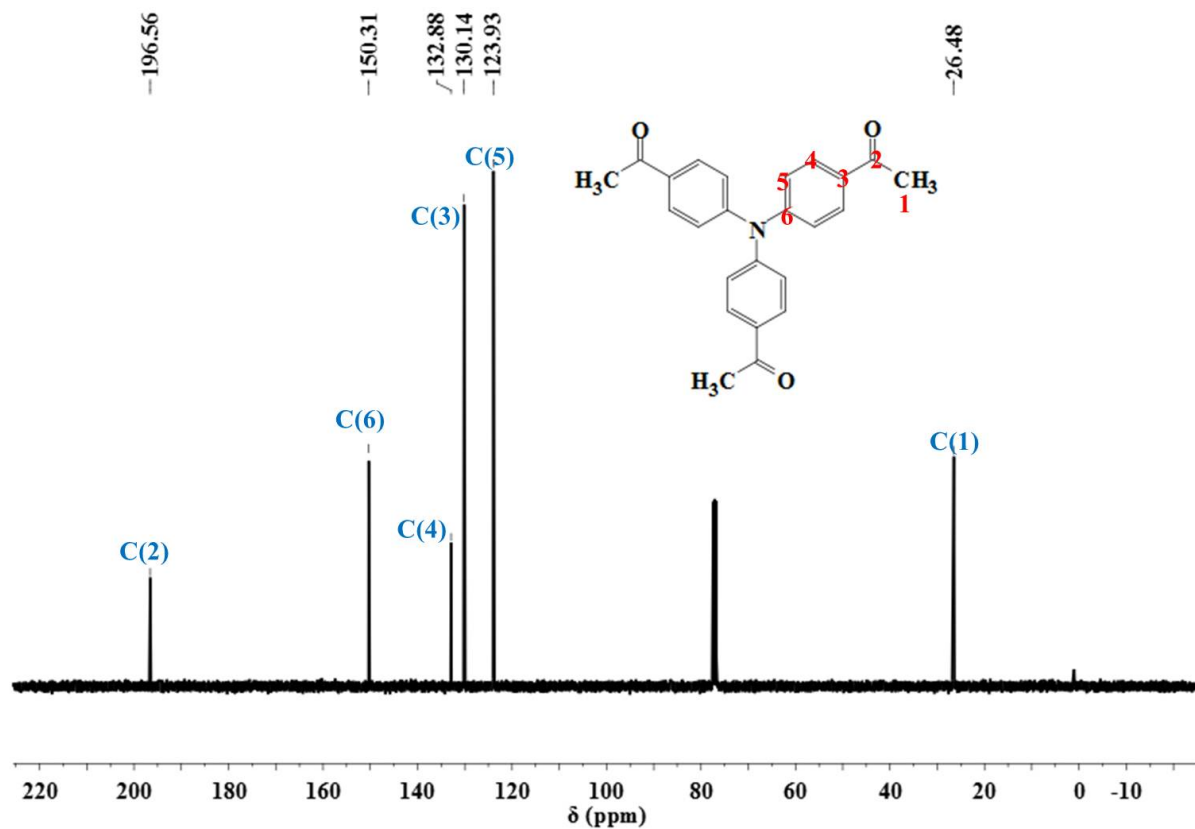

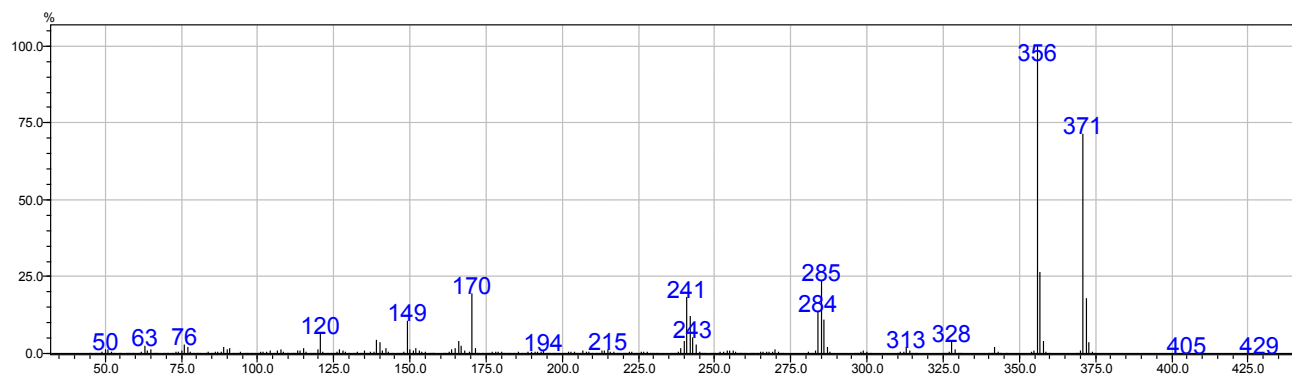

Figure S19 GC-MS spectrum of A5

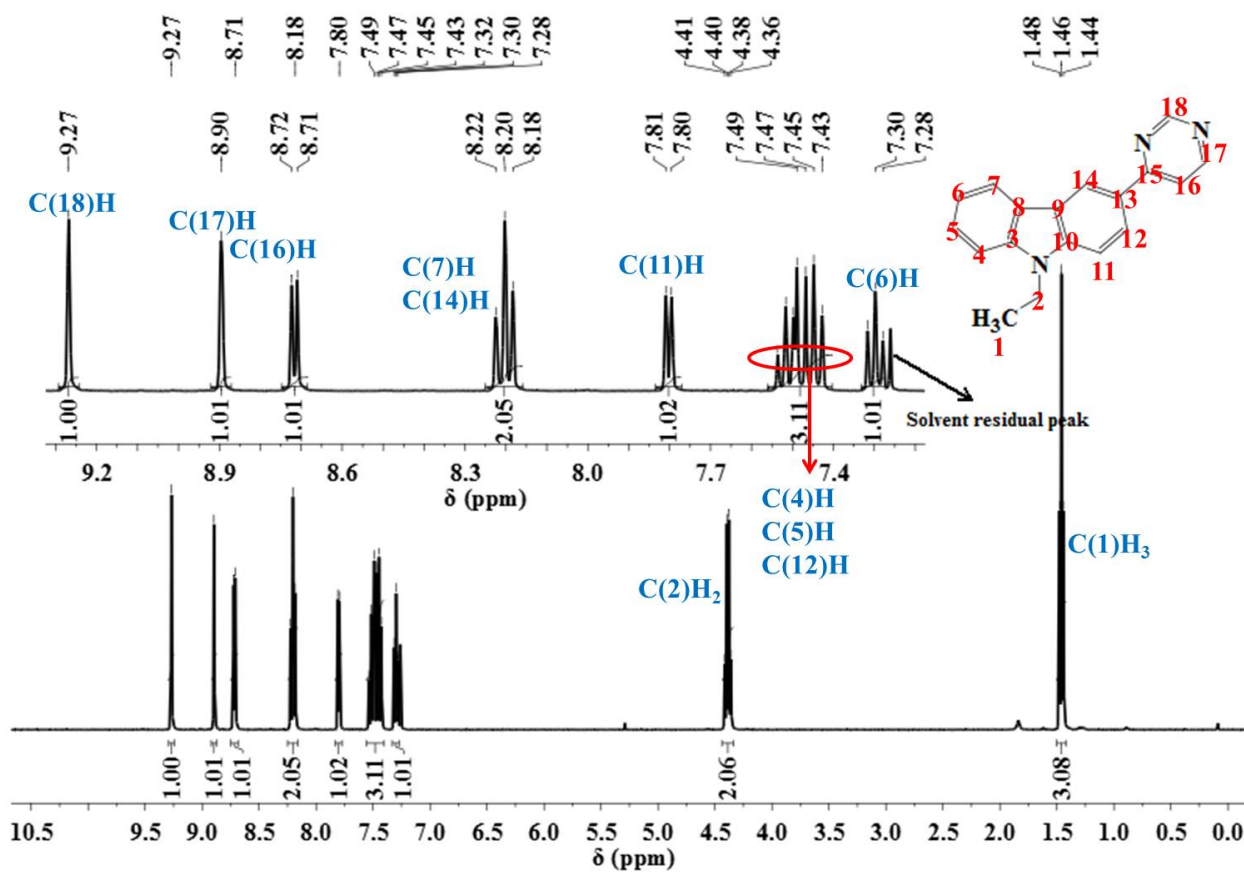

Figure S20  $^1\text{H}$  NMR of PM1 in  $\text{CDCl}_3$

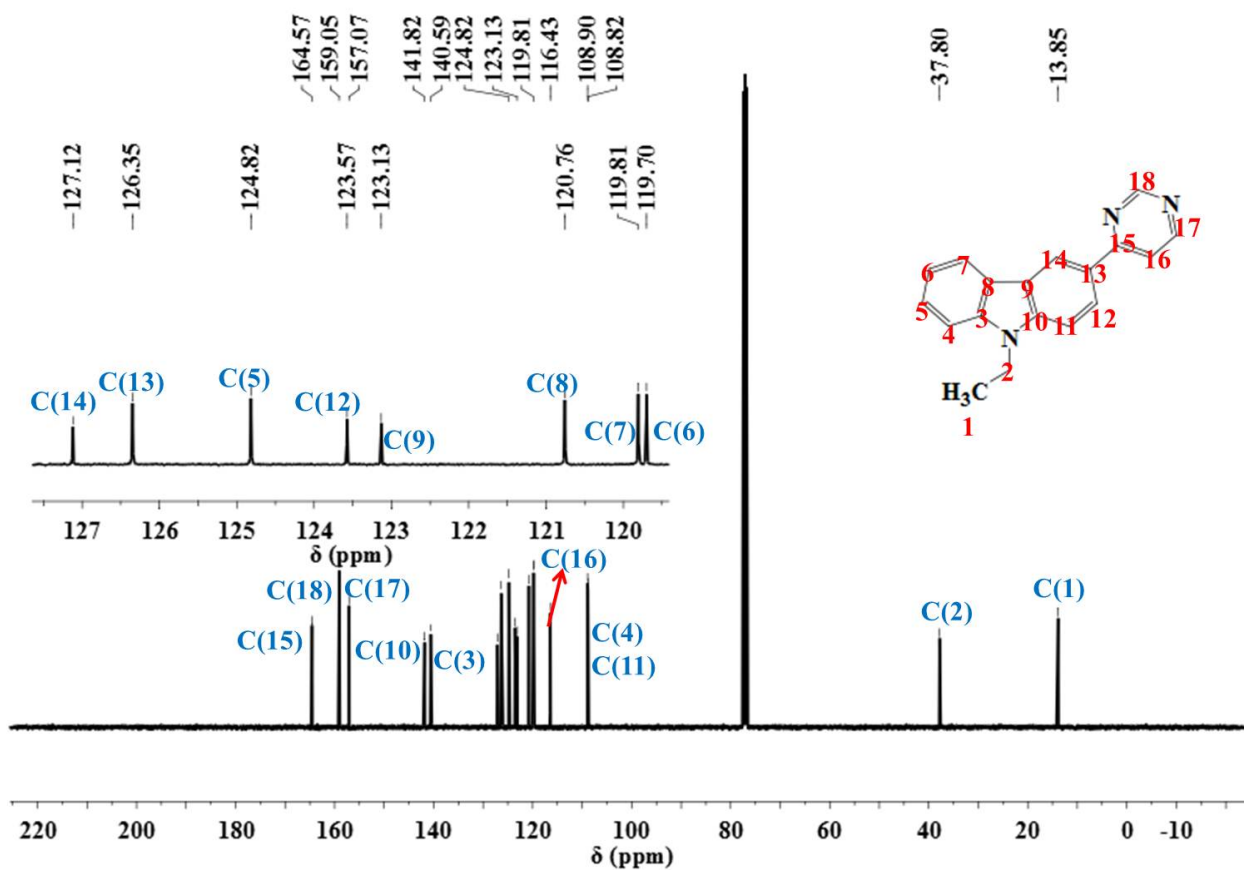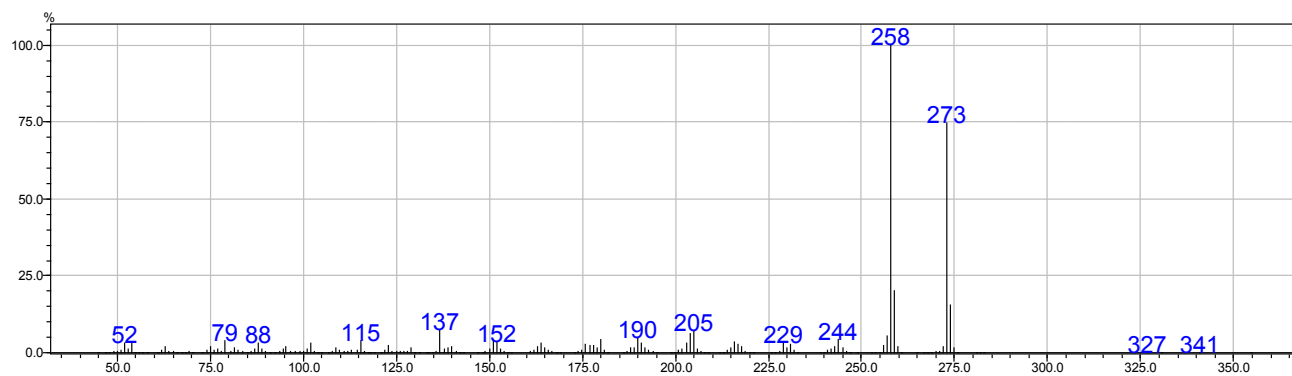

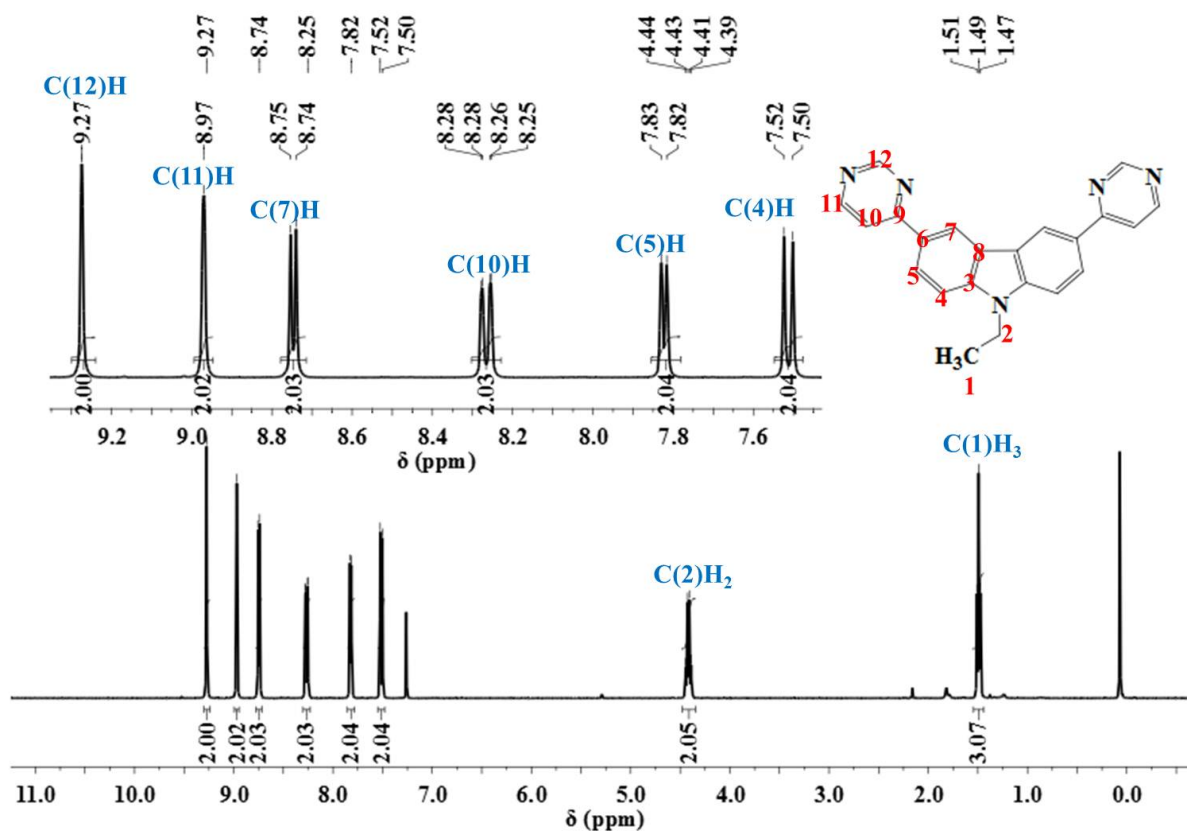

**Figure S23**  $^1\text{H}$  NMR of PM2 in  $\text{CDCl}_3$

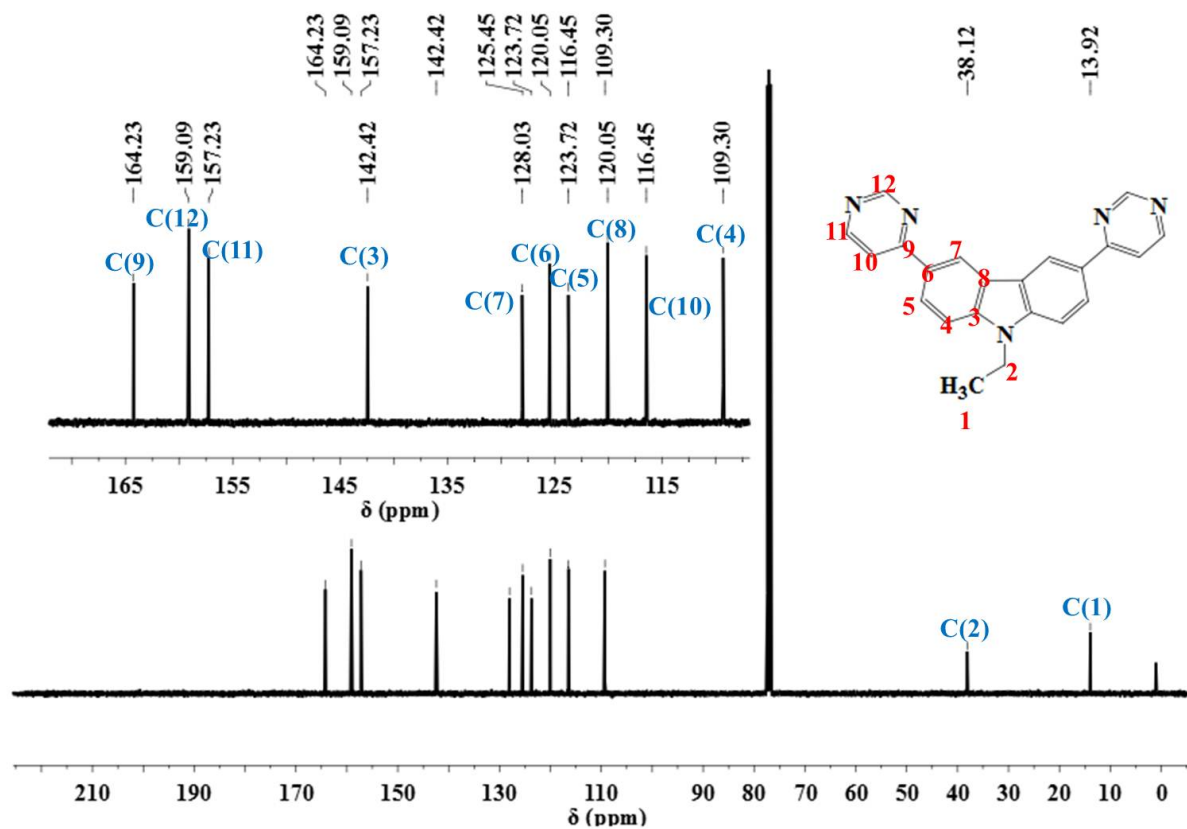

**Figure S24**  $^{13}\text{C}$  NMR of PM2 in  $\text{CDCl}_3$

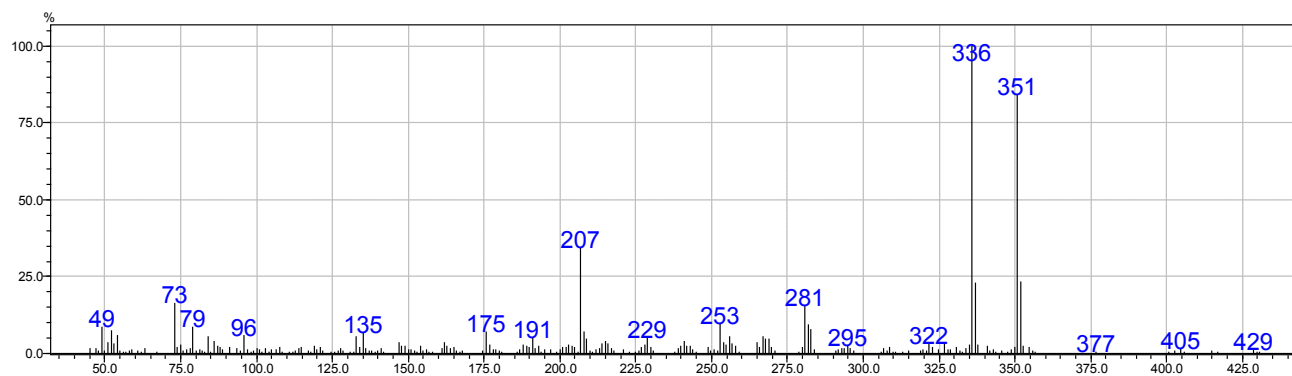

Figure S25 GC-MS spectrum of PM2

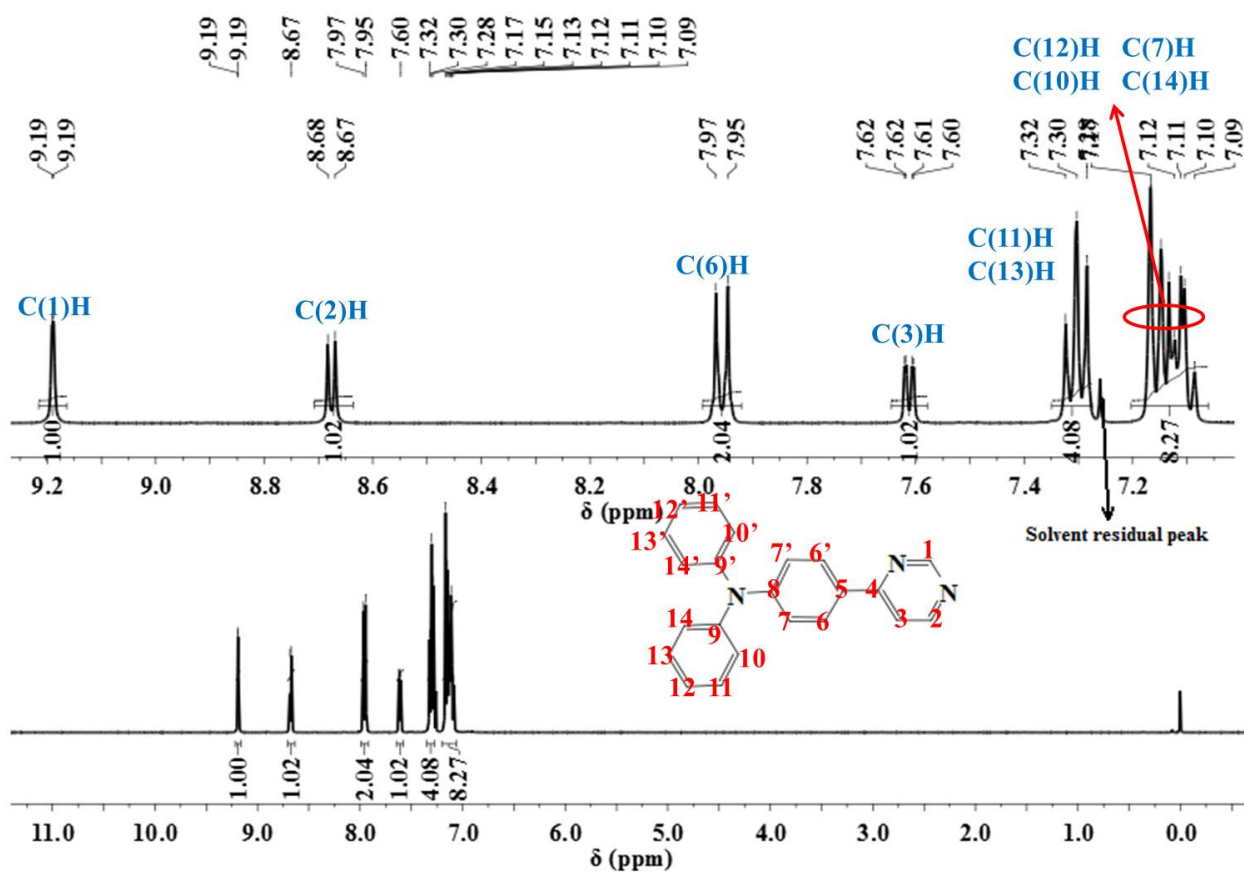

Figure S26  $^1\text{H}$  NMR of PM3 in  $\text{CDCl}_3$

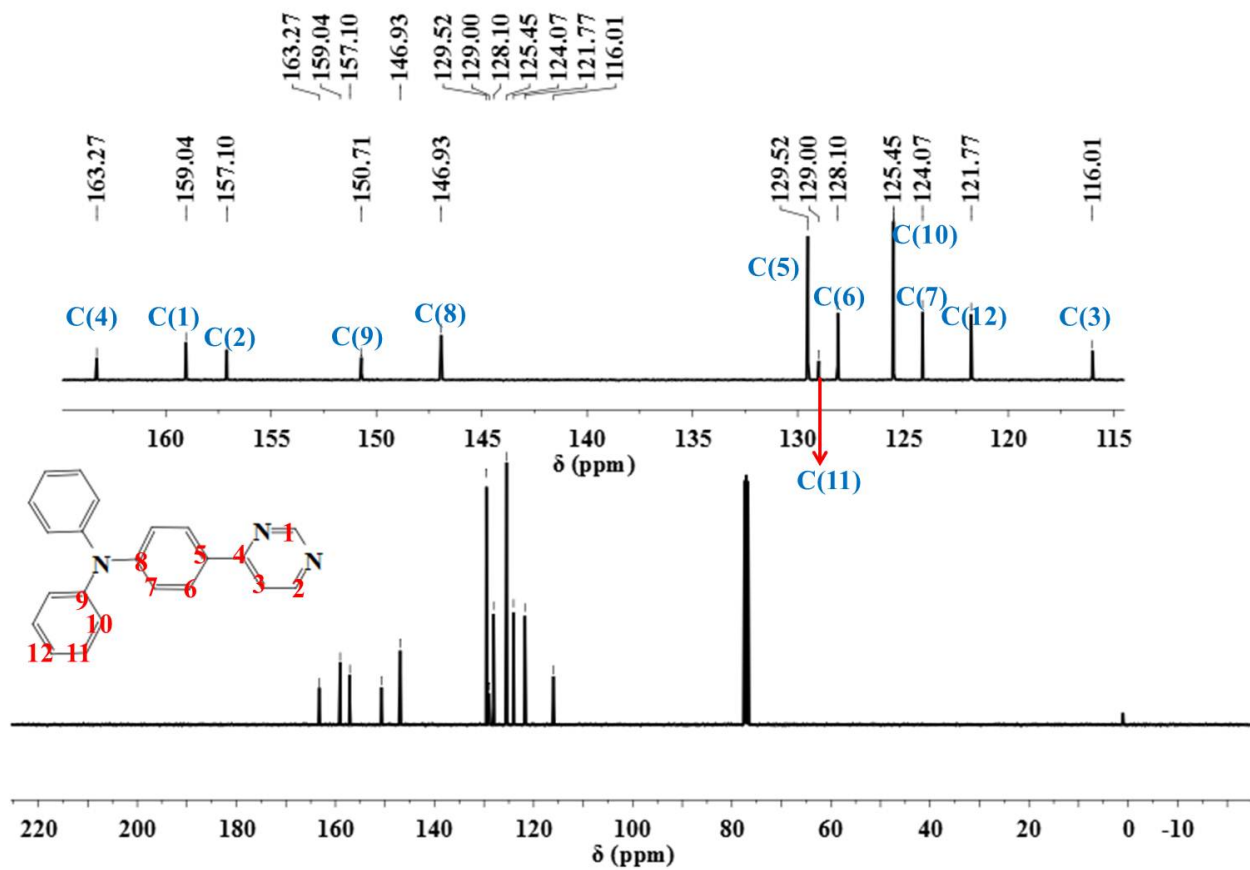

Figure S27 <sup>13</sup>C NMR of PM3 in CDCl<sub>3</sub>

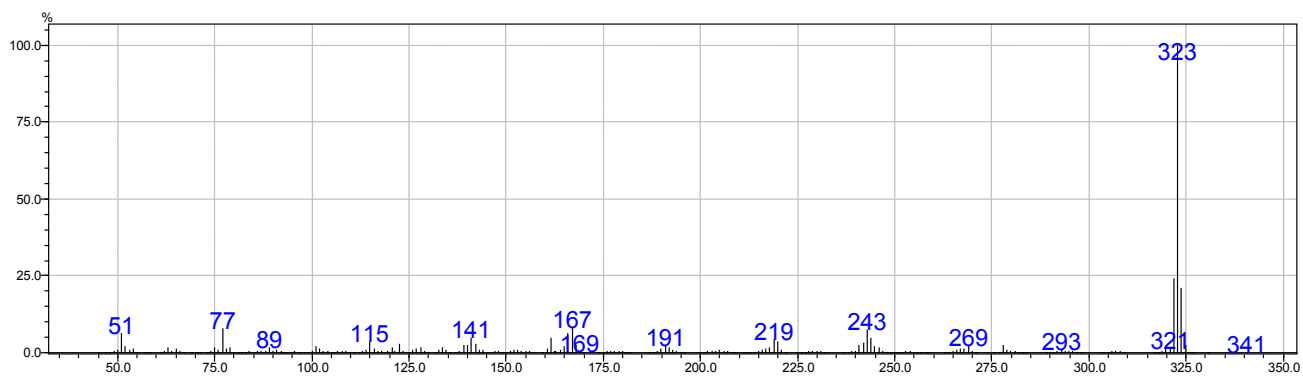

Figure S28 GC-MS spectrum of PM3

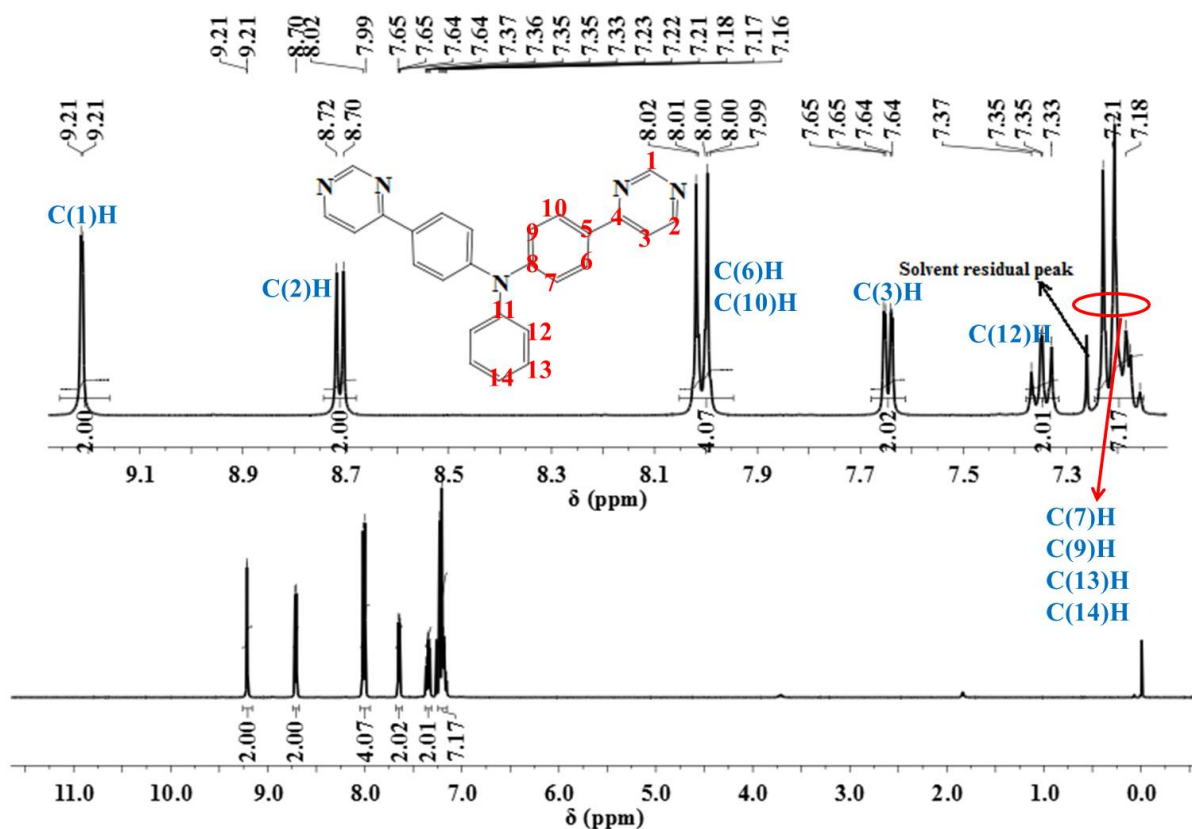

**Figure S29**  $^1\text{H}$  NMR of PM4 in  $\text{CDCl}_3$

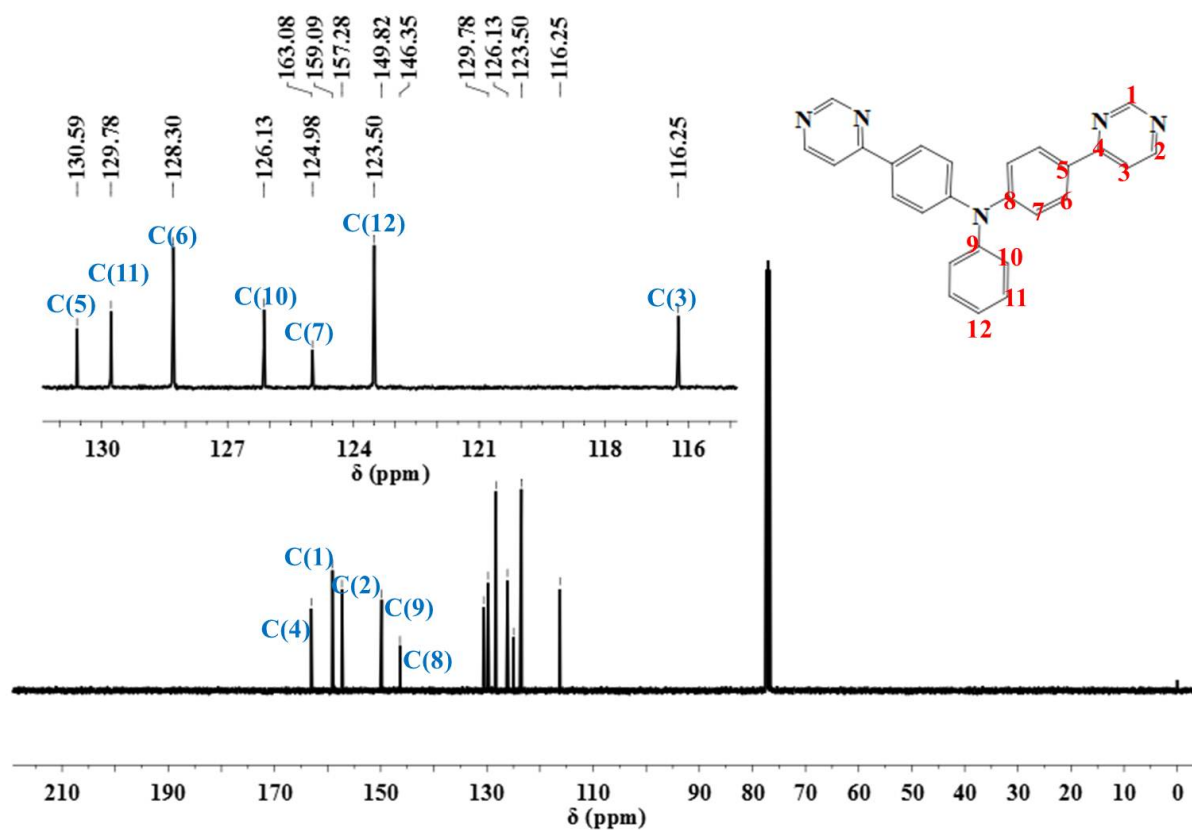

**Figure S30**  $^{13}\text{C}$  NMR of PM4 in  $\text{CDCl}_3$



D:\Data\DATA\MQB\WJN\PM4\0\_017\1\1Ref

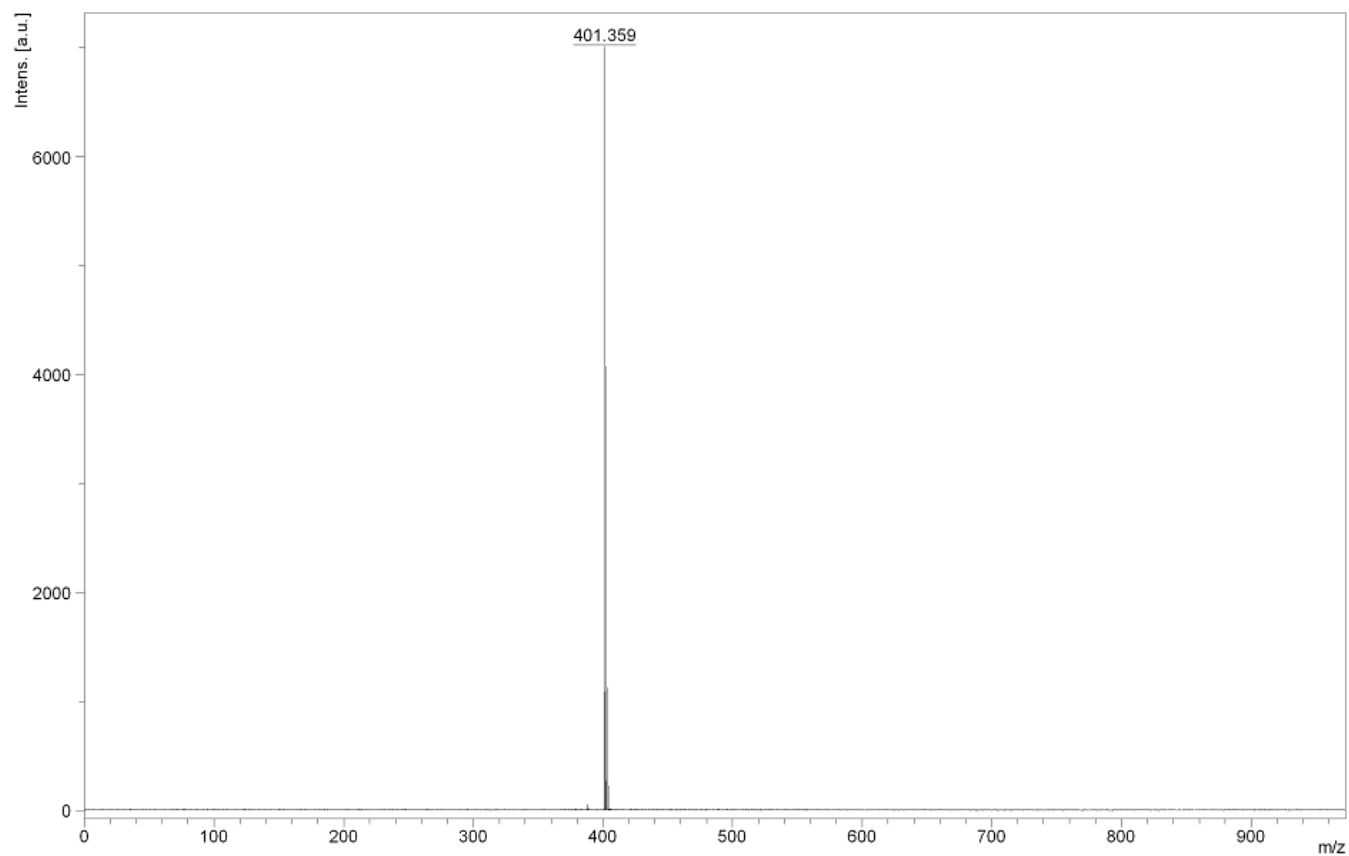

Bruker Daltonics flexAnalysis

printed: 11/9/2012 11:55:44 AM

**Figure S31** MALDI-TOF-MS spectrum of **PM4**

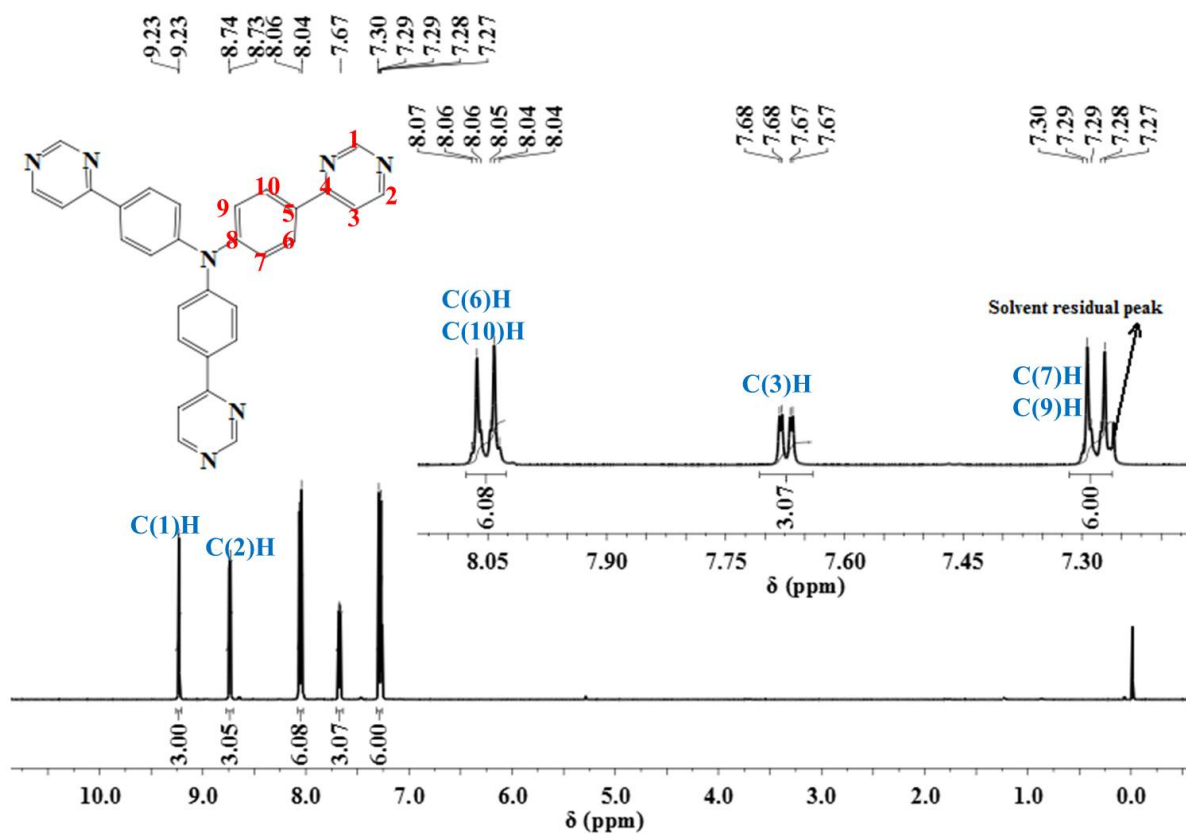

Figure S32 <sup>1</sup>H NMR of PM5 in CDCl<sub>3</sub>

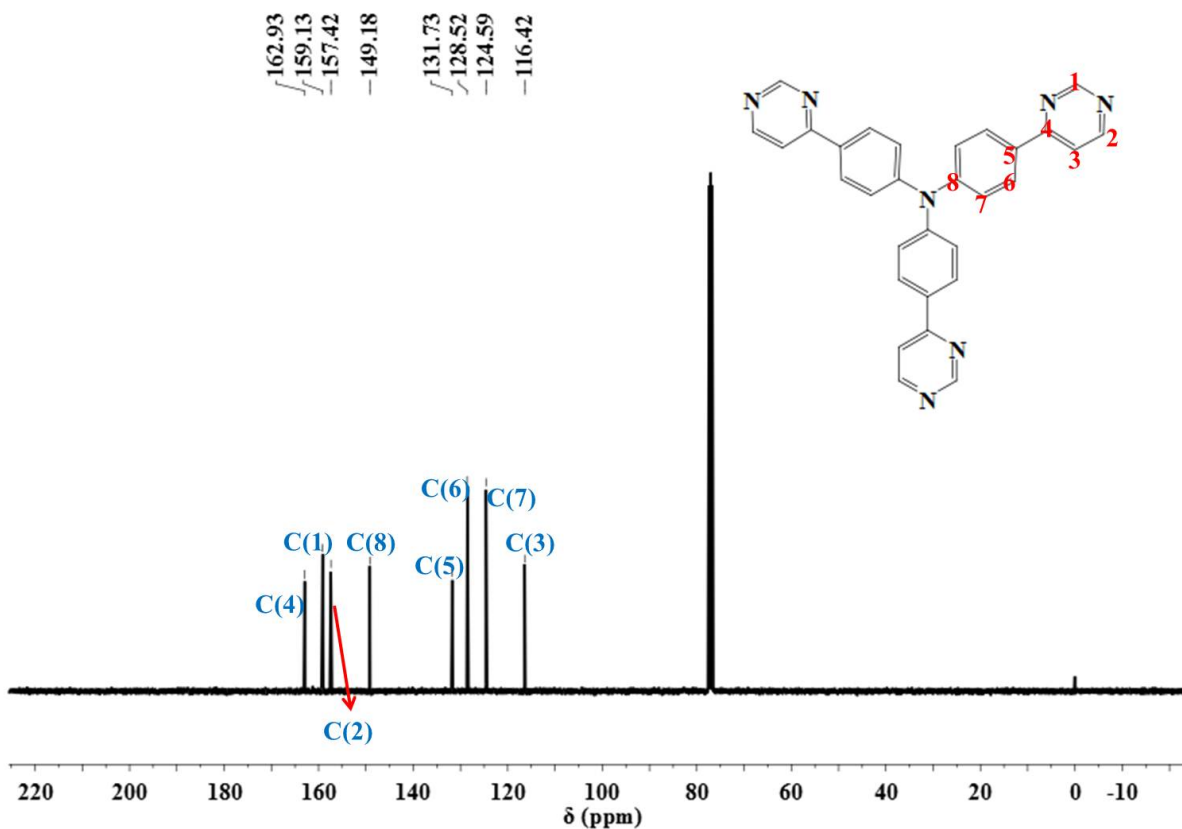

Figure S33 <sup>13</sup>C NMR of PM5 in CDCl<sub>3</sub>

D:\Data\DATA\MQB\WJN\WJN-PM5-2\0\_C13\1\1Ref

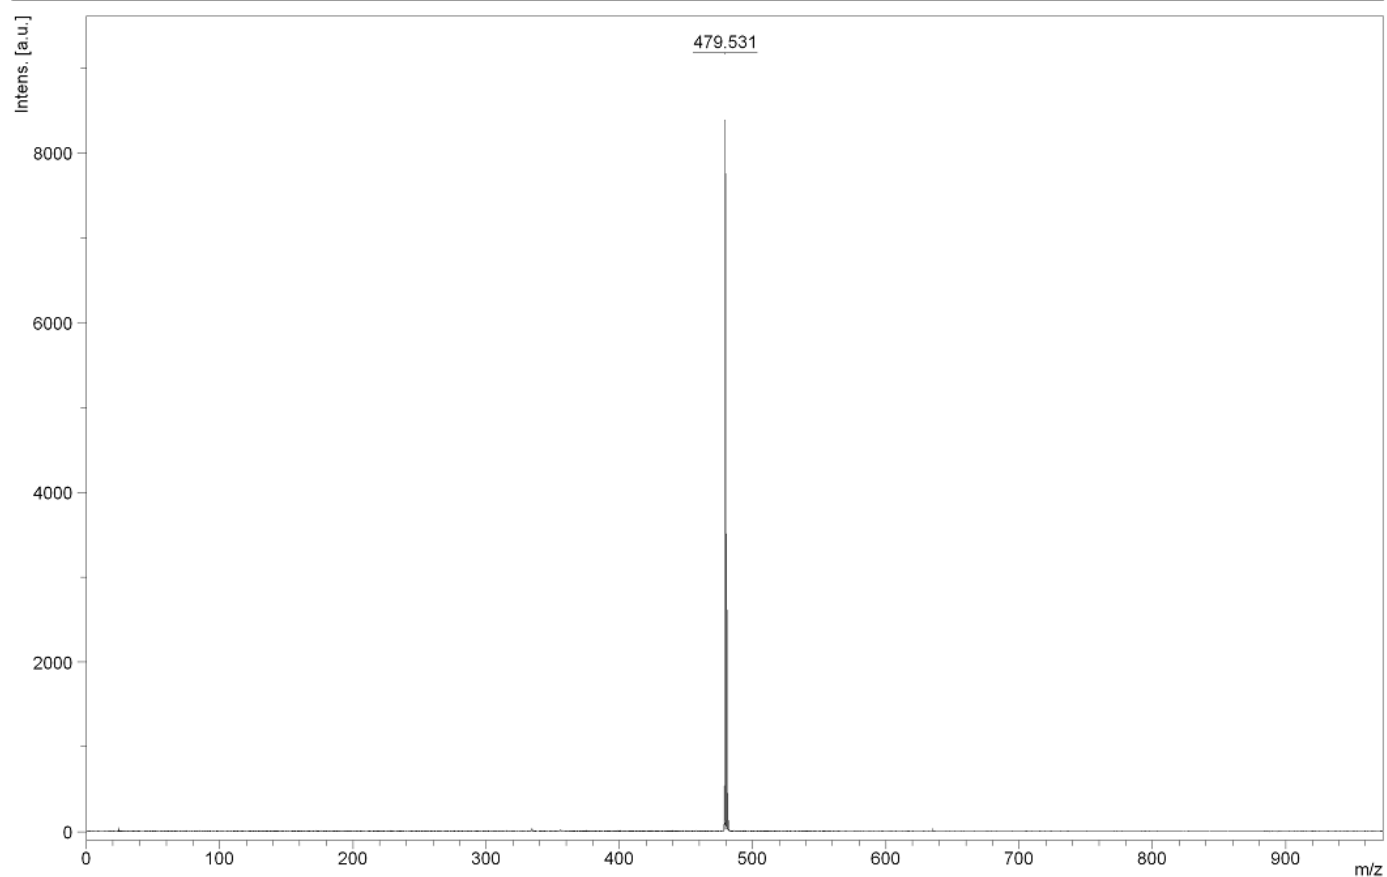

Bruker Daltonics flexAnalysis

printed: 11/19/2012 5:11:34 PM

**Figure S34** MALDI-TOF-MS spectrum of **PM5**
